# Supplementary material for: Multiple-gene targeting and mismatch tolerance can confound analysis of genome-wide pooled CRISPR screens
Source: Genome Biol. 2019 Jan 25;20:21. doi: 10.1186/s13059-019-1621-7 (PMC6346559; doi:10.1186/s13059-019-1621-7)
Supplement: Supplementary file 1 — Table S1 Genomic alignments for MYL12A and MYL12B guides in the Avana library. Figure S1 Log-fold changes for double-target guides. Figure S2 The effect of multi-target guides in readthrough genes. Figure S3 Off-target effects for guides targeting 3 self-correlated genes. Figure S4 On-target and off-target cleavage toxicity in the GeCKOv2-Achilles and Brunello datasets. (PDF 350 kb) [file 13059_2019_1621_MOESM1_ESM.pdf]

	gene	n.guides	n.multiplex.guides	n.multiplex.guides.exonic	n.mismatch.guides	n.mismatch.guides.exonic	flag	flag.exonic
A1BG	A1BG	4	0	0	0	0	NO	NO
A1CF	A1CF	4	0	0	0	0	NO	NO
A2M	A2M	4	0	0	1	1	YES	YES
A2ML1	A2ML1	4	0	0	0	0	NO	NO
A3GALT2	A3GALT2	4	0	0	0	0	NO	NO
A4GALT	A4GALT	4	0	0	0	0	NO	NO
A4GNT	A4GNT	4	1	0	0	0	YES	NO
AAAS	AAAS	4	0	0	0	0	NO	NO
AACS	AACS	4	0	0	0	0	NO	NO
AADAC	AADAC	4	0	0	0	0	NO	NO
AADACL2	AADACL2	4	0	0	0	0	NO	NO
AADACL3	AADACL3	4	0	0	0	0	NO	NO
AADACL4	AADACL4	4	0	0	0	0	NO	NO
AADAT	AADAT	4	0	0	0	0	NO	NO
AAED1	AAED1	4	0	0	0	0	NO	NO
AAGAB	AAGAB	4	0	0	0	0	NO	NO
AAK1	AAK1	4	0	0	0	0	NO	NO
AAMDC	AAMDC	4	0	0	1	0	YES	NO
AAMP	AAMP	4	0	0	0	0	NO	NO
AANAT	AANAT	4	0	0	0	0	NO	NO
AAR2	AAR2	4	0	0	0	0	NO	NO
AARD	AARD	4	0	0	0	0	NO	NO
AARS	AARS	4	0	0	0	0	NO	NO
AARS2	AARS2	4	0	0	0	0	NO	NO
AARSD1	AARSD1	1	0	0	0	0	NO	NO
AASDH	AASDH	4	0	0	0	0	NO	NO
AASDHPPT	AASDHPPT	4	0	0	0	0	NO	NO
AASS	AASS	4	0	0	0	0	NO	NO
AATF	AATF	4	0	0	0	0	NO	NO
AATK	AATK	4	0	0	0	0	NO	NO
ABAT	ABAT	4	0	0	0	0	NO	NO
ABCA1	ABCA1	4	0	0	1	0	YES	NO
ABCA10	ABCA10	4	0	0	0	0	NO	NO
ABCA12	ABCA12	4	0	0	0	0	NO	NO
ABCA13	ABCA13	4	0	0	0	0	NO	NO
ABCA2	ABCA2	4	0	0	0	0	NO	NO
ABCA3	ABCA3	4	0	0	0	0	NO	NO
ABCA4	ABCA4	4	0	0	0	0	NO	NO
ABCA5	ABCA5	4	0	0	0	0	NO	NO
ABCA6	ABCA6	4	0	0	0	0	NO	NO
ABCA7	ABCA7	4	0	0	0	0	NO	NO
ABCA8	ABCA8	4	0	0	0	0	NO	NO
ABCA9	ABCA9	4	0	0	0	0	NO	NO
ABCB1	ABCB1	4	0	0	0	0	NO	NO
ABCB10	ABCB10	4	0	0	0	0	NO	NO
ABCB11	ABCB11	4	0	0	0	0	NO	NO
ABCB4	ABCB4	4	0	0	0	0	NO	NO
ABCB5	ABCB5	4	0	0	0	0	NO	NO
ABCB6	ABCB6	4	0	0	0	0	NO	NO
ABCB7	ABCB7	4	0	0	1	0	YES	NO
ABCB8	ABCB8	4	0	0	0	0	NO	NO
ABCB9	ABCB9	4	0	0	0	0	NO	NO
ABCC1	ABCC1	4	0	0	0	0	NO	NO
ABCC10	ABCC10	4	0	0	0	0	NO	NO
ABCC11	ABCC11	4	0	0	0	0	NO	NO
ABCC12	ABCC12	4	0	0	0	0	NO	NO
ABCC2	ABCC2	4	0	0	0	0	NO	NO
ABCC3	ABCC3	4	0	0	0	0	NO	NO
ABCC4	ABCC4	4	0	0	0	0	NO	NO
ABCC5	ABCC5	4	0	0	0	0	NO	NO
ABCC6	ABCC6	4	4	4	0	0	YES	YES
ABCC8	ABCC8	4	0	0	0	0	NO	NO
ABCC9	ABCC9	4	0	0	0	0	NO	NO
ABCD1	ABCD1	4	0	0	0	0	NO	NO
ABCD2	ABCD2	4	0	0	0	0	NO	NO
ABCD3	ABCD3	4	0	0	0	0	NO	NO
ABCD4	ABCD4	4	0	0	0	0	NO	NO
ABCE1	ABCE1	4	2	2	4	3	YES	YES
ABCF1	ABCF1	4	0	0	0	0	NO	NO
ABCF2	ABCF2	4	0	0	0	0	NO	NO
ABCF3	ABCF3	4	0	0	0	0	NO	NO
ABCG1	ABCG1	4	0	0	0	0	NO	NO
ABCG2	ABCG2	4	0	0	1	0	YES	NO
ABCG4	ABCG4	4	0	0	0	0	NO	NO
ABCG5	ABCG5	4	0	0	0	0	NO	NO
ABCG8	ABCG8	4	0	0	0	0	NO	NO
ABHD1	ABHD1	4	0	0	0	0	NO	NO
ABHD10	ABHD10	4	0	0	1	0	YES	NO
ABHD11	ABHD11	4	0	0	0	0	NO	NO
ABHD12	ABHD12	4	0	0	0	0	NO	NO
ABHD12B	ABHD12B	4	0	0	0	0	NO	NO
ABHD13	ABHD13	4	0	0	0	0	NO	NO
ABHD14A	ABHD14A	4	0	0	0	0	NO	NO
ABHD14B	ABHD14B	4	0	0	0	0	NO	NO
ABHD15	ABHD15	4	0	0	0	0	NO	NO
ABHD16A	ABHD16A	4	0	0	0	0	NO	NO
ABHD16B	ABHD16B	4	0	0	0	0	NO	NO
ABHD17A	ABHD17A	3	1	1	1	1	YES	YES
ABHD17B	ABHD17B	4	0	0	0	0	NO	NO
ABHD17C	ABHD17C	4	0	0	0	0	NO	NO
ABHD2	ABHD2	4	0	0	0	0	NO	NO
ABHD3	ABHD3	4	0	0	0	0	NO	NO
ABHD4	ABHD4	4	0	0	0	0	NO	NO
ABHD5	ABHD5	4	0	0	0	0	NO	NO
ABHD6	ABHD6	4	0	0	0	0	NO	NO
ABHD8	ABHD8	4	0	0	0	0	NO	NO
ABI1	ABI1	4	0	0	1	0	YES	NO
ABI2	ABI2	4	0	0	0	0	NO	NO
ABI3	ABI3	4	0	0	1	0	YES	NO
ABI3BP	ABI3BP	4	0	0	0	0	NO	NO
ABL1	ABL1	4	0	0	0	0	NO	NO
ABL2	ABL2	4	0	0	0	0	NO	NO
ABLIM1	ABLIM1	4	0	0	1	0	YES	NO
ABLIM2	ABLIM2	4	0	0	0	0	NO	NO
ABLIM3	ABLIM3	4	0	0	0	0	NO	NO
ABR	ABR	4	0	0	0	0	NO	NO
ABRA	ABRA	4	0	0	0	0	NO	NO
ABRACL	ABRACL	4	0	0	0	0	NO	NO
ABT1	ABT1	4	0	0	0	0	NO	NO
ABTB1	ABTB1	4	0	0	0	0	NO	NO
ABTB2	ABTB2	4	0	0	0	0	NO	NO
AC007040.11	AC007040.11	3	0	0	0	0	NO	NO
AC007431.1	AC007431.1	4	0	0	0	0	NO	NO
AC009892.10	AC009892.10	1	0	0	1	1	YES	YES
AC016722.1	AC016722.1	4	0	0	1	0	YES	NO
AC016757.3	AC016757.3	4	0	0	0	0	NO	NO
AC018755.1	AC018755.1	4	0	0	0	0	NO	NO
AC079612.1	AC079612.1	4	0	0	0	0	NO	NO
AC091801.1	AC091801.1	4	0	0	0	0	NO	NO
AC093802.1	AC093802.1	4	0	0	0	0	NO	NO
AC106876.2	AC106876.2	4	0	0	0	0	NO	NO
ACAA1	ACAA1	4	0	0	0	0	NO	NO
ACAA2	ACAA2	4	1	1	1	0	YES	YES
ACACA	ACACA	4	0	0	0	0	NO	NO
ACACB	ACACB	4	0	0	0	0	NO	NO
ACAD10	ACAD10	4	0	0	0	0	NO	NO
ACAD11	ACAD11	4	0	0	0	0	NO	NO
ACAD8	ACAD8	4	0	0	0	0	NO	NO
ACAD9	ACAD9	4	0	0	0	0	NO	NO
ACADL	ACADL	4	0	0	0	0	NO	NO
ACADM	ACADM	4	0	0	0	0	NO	NO
ACADS	ACADS	4	0	0	0	0	NO	NO
ACADSB	ACADSB	4	0	0	0	0	NO	NO
ACADVL	ACADVL	4	0	0	0	0	NO	NO
ACAN	ACAN	4	0	0	2	2	YES	YES
ACAP1	ACAP1	4	0	0	0	0	NO	NO
ACAP2	ACAP2	4	0	0	0	0	NO	NO
ACAP3	ACAP3	4	0	0	0	0	NO	NO
ACAT1	ACAT1	4	0	0	0	0	NO	NO
ACAT2	ACAT2	4	0	0	0	0	NO	NO
ACBD3	ACBD3	4	0	0	0	0	NO	NO
ACBD4	ACBD4	4	0	0	0	0	NO	NO
ACBD5	ACBD5	4	0	0	0	0	NO	NO
ACBD6	ACBD6	4	0	0	0	0	NO	NO
ACBD7	ACBD7	4	0	0	0	0	NO	NO
ACCS	ACCS	4	0	0	0	0	NO	NO
ACCSL	ACCSL	4	0	0	0	0	NO	NO
ACD	ACD	4	0	0	0	0	NO	NO
ACE	ACE	4	0	0	1	1	YES	YES
ACE2	ACE2	4	0	0	0	0	NO	NO
ACER1	ACER1	4	0	0	0	0	NO	NO
ACER2	ACER2	4	2	2	1	1	YES	YES
ACER3	ACER3	4	0	0	0	0	NO	NO
ACHE	ACHE	4	0	0	0	0	NO	NO
ACIN1	ACIN1	4	0	0	0	0	NO	NO
ACKR2	ACKR2	4	0	0	0	0	NO	NO
ACKR3	ACKR3	4	0	0	0	0	NO	NO
ACKR4	ACKR4	4	4	4	0	0	YES	YES
ACLY	ACLY	4	0	0	0	0	NO	NO
ACMSD	ACMSD	4	0	0	1	0	YES	NO
ACN9	ACN9	4	0	0	1	1	YES	YES
ACO1	ACO1	4	0	0	0	0	NO	NO
ACO2	ACO2	4	1	1	1	1	YES	YES
ACOT11	ACOT11	4	0	0	0	0	NO	NO
ACOT12	ACOT12	4	0	0	0	0	NO	NO
ACOT13	ACOT13	4	0	0	0	0	NO	NO
ACOT2	ACOT2	4	0	0	0	0	NO	NO
ACOT4	ACOT4	4	0	0	2	2	YES	YES
ACOT6	ACOT6	4	0	0	0	0	NO	NO
ACOT7	ACOT7	4	0	0	1	1	YES	YES
ACOT8	ACOT8	4	0	0	0	0	NO	NO
ACOT9	ACOT9	4	0	0	0	0	NO	NO
ACOX1	ACOX1	4	0	0	0	0	NO	NO
ACOX2	ACOX2	4	0	0	0	0	NO	NO
ACOX3	ACOX3	4	0	0	0	0	NO	NO
ACOXL	ACOXL	4	0	0	0	0	NO	NO
ACP1	ACP1	4	1	1	1	1	YES	YES
ACP2	ACP2	4	0	0	0	0	NO	NO
ACP5	ACP5	4	0	0	0	0	NO	NO
ACP6	ACP6	4	0	0	0	0	NO	NO
ACPL2	ACPL2	4	0	0	0	0	NO	NO
ACPP	ACPP	4	0	0	0	0	NO	NO
ACPT	ACPT	4	0	0	0	0	NO	NO
ACR	ACR	4	2	2	0	0	YES	YES
ACRBP	ACRBP	4	0	0	0	0	NO	NO
ACRC	ACRC	4	0	0	0	0	NO	NO
ACRV1	ACRV1	4	0	0	0	0	NO	NO
ACSBG1	ACSBG1	4	0	0	0	0	NO	NO
ACSBG2	ACSBG2	4	1	1	0	0	YES	YES
ACSF2	ACSF2	4	0	0	0	0	NO	NO
ACSF3	ACSF3	4	0	0	0	0	NO	NO
ACSL1	ACSL1	4	0	0	0	0	NO	NO
ACSL3	ACSL3	4	0	0	0	0	NO	NO
ACSL4	ACSL4	4	0	0	0	0	NO	NO
ACSL5	ACSL5	4	0	0	0	0	NO	NO
ACSL6	ACSL6	4	0	0	0	0	NO	NO
ACSM1	ACSM1	4	0	0	0	0	NO	NO
ACSM2A	ACSM2A	2	0	0	0	0	NO	NO
ACSM2B	ACSM2B	4	0	0	0	0	NO	NO
ACSM3	ACSM3	4	0	0	1	0	YES	NO
ACSM4	ACSM4	4	0	0	0	0	NO	NO
ACSM5	ACSM5	4	2	2	1	0	YES	YES
ACSS1	ACSS1	4	0	0	0	0	NO	NO
ACSS2	ACSS2	4	0	0	0	0	NO	NO
ACSS3	ACSS3	4	0	0	0	0	NO	NO
ACTA1	ACTA1	4	0	0	0	0	NO	NO
ACTA2	ACTA2	4	0	0	0	0	NO	NO
ACTB	ACTB	3	0	0	0	0	NO	NO
ACTBL2	ACTBL2	4	0	0	0	0	NO	NO
ACTC1	ACTC1	4	0	0	0	0	NO	NO
ACTG1	ACTG1	4	0	0	0	0	NO	NO
ACTG2	ACTG2	4	0	0	0	0	NO	NO
ACTL10	ACTL10	4	0	0	0	0	NO	NO
ACTL6A	ACTL6A	4	0	0	0	0	NO	NO
ACTL6B	ACTL6B	4	0	0	0	0	NO	NO
ACTL7A	ACTL7A	4	0	0	0	0	NO	NO
ACTL7B	ACTL7B	4	0	0	0	0	NO	NO
ACTL8	ACTL8	4	0	0	0	0	NO	NO
ACTL9	ACTL9	4	0	0	0	0	NO	NO
ACTN1	ACTN1	4	0	0	0	0	NO	NO
ACTN2	ACTN2	4	0	0	0	0	NO	NO
ACTN4	ACTN4	4	0	0	0	0	NO	NO
ACTR10	ACTR10	4	0	0	0	0	NO	NO
ACTR1A	ACTR1A	4	1	1	0	0	YES	YES
ACTR1B	ACTR1B	4	0	0	0	0	NO	NO
ACTR2	ACTR2	4	2	2	1	1	YES	YES
ACTR3	ACTR3	4	0	0	2	1	YES	YES
ACTR3B	ACTR3B	4	0	0	0	0	NO	NO
ACTR3C	ACTR3C	2	2	0	0	0	YES	NO
ACTR5	ACTR5	4	0	0	0	0	NO	NO
ACTR6	ACTR6	4	0	0	0	0	NO	NO
ACTR8	ACTR8	4	0	0	0	0	NO	NO
ACTRT1	ACTRT1	4	0	0	0	0	NO	NO
ACTRT2	ACTRT2	4	0	0	0	0	NO	NO
ACTRT3	ACTRT3	4	0	0	0	0	NO	NO
ACVR1	ACVR1	4	0	0	0	0	NO	NO
ACVR1B	ACVR1B	4	0	0	0	0	NO	NO
ACVR1C	ACVR1C	4	0	0	0	0	NO	NO
ACVR2A	ACVR2A	4	0	0	0	0	NO	NO
ACVR2B	ACVR2B	4	0	0	0	0	NO	NO
ACVRL1	ACVRL1	4	0	0	0	0	NO	NO
ACY1	ACY1	4	0	0	0	0	NO	NO
ACY3	ACY3	4	0	0	0	0	NO	NO
ACYP1	ACYP1	4	0	0	0	0	NO	NO
ACYP2	ACYP2	4	0	0	0	0	NO	NO
ADA	ADA	4	0	0	0	0	NO	NO
ADAD1	ADAD1	4	0	0	0	0	NO	NO
ADAD2	ADAD2	4	0	0	1	0	YES	NO
ADAL	ADAL	4	0	0	0	0	NO	NO
ADAM10	ADAM10	4	0	0	0	0	NO	NO
ADAM11	ADAM11	4	0	0	0	0	NO	NO
ADAM12	ADAM12	4	0	0	0	0	NO	NO
ADAM15	ADAM15	4	0	0	0	0	NO	NO
ADAM17	ADAM17	4	0	0	0	0	NO	NO
ADAM18	ADAM18	4	0	0	0	0	NO	NO
ADAM19	ADAM19	4	0	0	0	0	NO	NO
ADAM2	ADAM2	4	0	0	0	0	NO	NO
ADAM20	ADAM20	4	0	0	0	0	NO	NO
ADAM21	ADAM21	4	3	3	1	1	YES	YES
ADAM22	ADAM22	4	0	0	0	0	NO	NO
ADAM23	ADAM23	4	0	0	0	0	NO	NO
ADAM28	ADAM28	4	0	0	0	0	NO	NO
ADAM29	ADAM29	4	0	0	2	2	YES	YES
ADAM30	ADAM30	4	0	0	0	0	NO	NO
ADAM32	ADAM32	4	0	0	0	0	NO	NO
ADAM33	ADAM33	4	0	0	0	0	NO	NO
ADAM7	ADAM7	4	0	0	0	0	NO	NO
ADAM8	ADAM8	4	0	0	0	0	NO	NO
ADAM9	ADAM9	4	0	0	0	0	NO	NO
ADAMDEC1	ADAMDEC1	4	0	0	0	0	NO	NO
ADAMTS1	ADAMTS1	4	0	0	0	0	NO	NO
ADAMTS10	ADAMTS10	4	0	0	0	0	NO	NO
ADAMTS12	ADAMTS12	4	0	0	0	0	NO	NO
ADAMTS13	ADAMTS13	4	0	0	0	0	NO	NO
ADAMTS14	ADAMTS14	4	0	0	0	0	NO	NO
ADAMTS15	ADAMTS15	4	0	0	0	0	NO	NO
ADAMTS16	ADAMTS16	4	0	0	0	0	NO	NO
ADAMTS17	ADAMTS17	4	0	0	0	0	NO	NO
ADAMTS18	ADAMTS18	4	0	0	0	0	NO	NO
ADAMTS19	ADAMTS19	4	0	0	0	0	NO	NO
ADAMTS2	ADAMTS2	4	0	0	0	0	NO	NO
ADAMTS20	ADAMTS20	4	0	0	0	0	NO	NO
ADAMTS3	ADAMTS3	4	0	0	0	0	NO	NO
ADAMTS4	ADAMTS4	4	0	0	0	0	NO	NO
ADAMTS5	ADAMTS5	4	0	0	0	0	NO	NO
ADAMTS7	ADAMTS7	4	0	0	1	1	YES	YES
ADAMTS8	ADAMTS8	4	0	0	0	0	NO	NO
ADAMTS9	ADAMTS9	4	0	0	0	0	NO	NO
ADAMTSL1	ADAMTSL1	4	0	0	0	0	NO	NO
ADAMTSL2	ADAMTSL2	4	0	0	0	0	NO	NO
ADAMTSL3	ADAMTSL3	4	0	0	0	0	NO	NO
ADAMTSL4	ADAMTSL4	4	0	0	1	0	YES	NO
ADAMTSL4-AS1	ADAMTSL4-AS1	4	0	0	0	0	NO	NO
ADAMTSL5	ADAMTSL5	4	0	0	0	0	NO	NO
ADAP1	ADAP1	4	0	0	0	0	NO	NO
ADAP2	ADAP2	4	0	0	0	0	NO	NO
ADAR	ADAR	4	0	0	1	1	YES	YES
ADARB1	ADARB1	4	0	0	0	0	NO	NO
ADARB2	ADARB2	4	0	0	0	0	NO	NO
ADAT1	ADAT1	4	0	0	1	0	YES	NO
ADAT2	ADAT2	4	0	0	0	0	NO	NO
ADAT3	ADAT3	4	0	0	0	0	NO	NO
ADC	ADC	4	0	0	0	0	NO	NO
ADCK1	ADCK1	4	0	0	0	0	NO	NO
ADCK2	ADCK2	4	0	0	0	0	NO	NO
ADCK3	ADCK3	4	0	0	0	0	NO	NO
ADCK4	ADCK4	4	0	0	0	0	NO	NO
ADCK5	ADCK5	4	0	0	0	0	NO	NO
ADCY1	ADCY1	4	0	0	0	0	NO	NO
ADCY10	ADCY10	4	0	0	0	0	NO	NO
ADCY2	ADCY2	4	0	0	0	0	NO	NO
ADCY3	ADCY3	4	0	0	0	0	NO	NO
ADCY4	ADCY4	4	0	0	0	0	NO	NO
ADCY5	ADCY5	4	0	0	0	0	NO	NO
ADCY6	ADCY6	4	0	0	0	0	NO	NO
ADCY7	ADCY7	4	0	0	0	0	NO	NO
ADCY8	ADCY8	4	0	0	0	0	NO	NO
ADCY9	ADCY9	4	0	0	0	0	NO	NO
ADCYAP1	ADCYAP1	4	0	0	0	0	NO	NO
ADCYAP1R1	ADCYAP1R1	4	0	0	0	0	NO	NO
ADD1	ADD1	4	0	0	0	0	NO	NO
ADD2	ADD2	4	0	0	0	0	NO	NO
ADD3	ADD3	4	0	0	0	0	NO	NO
ADGB	ADGB	4	0	0	1	0	YES	NO
ADH1A	ADH1A	4	0	0	0	0	NO	NO
ADH1B	ADH1B	4	3	3	0	0	YES	YES
ADH4	ADH4	4	0	0	0	0	NO	NO
ADH5	ADH5	4	1	1	2	2	YES	YES
ADH6	ADH6	4	0	0	0	0	NO	NO
ADH7	ADH7	4	0	0	0	0	NO	NO
ADHFE1	ADHFE1	4	0	0	0	0	NO	NO
ADI1	ADI1	4	0	0	0	0	NO	NO
ADIG	ADIG	4	0	0	0	0	NO	NO
ADIPOQ	ADIPOQ	4	0	0	0	0	NO	NO
ADIPOR1	ADIPOR1	4	0	0	2	1	YES	YES
ADIPOR2	ADIPOR2	4	0	0	0	0	NO	NO
ADIRF	ADIRF	4	0	0	0	0	NO	NO
ADK	ADK	4	0	0	0	0	NO	NO
ADM	ADM	4	0	0	0	0	NO	NO
ADM2	ADM2	4	0	0	0	0	NO	NO
ADM5	ADM5	4	0	0	0	0	NO	NO
ADNP	ADNP	4	0	0	0	0	NO	NO
ADNP2	ADNP2	4	0	0	0	0	NO	NO
ADO	ADO	4	0	0	0	0	NO	NO
ADORA1	ADORA1	4	0	0	0	0	NO	NO
ADORA2A	ADORA2A	4	0	0	0	0	NO	NO
ADORA2B	ADORA2B	4	0	0	1	1	YES	YES
ADORA3	ADORA3	4	0	0	0	0	NO	NO
ADPGK	ADPGK	4	1	1	0	0	YES	YES
ADPRH	ADPRH	4	0	0	0	0	NO	NO
ADPRHL1	ADPRHL1	4	0	0	0	0	NO	NO
ADPRHL2	ADPRHL2	4	0	0	0	0	NO	NO
ADPRM	ADPRM	4	0	0	0	0	NO	NO
ADRA1A	ADRA1A	4	0	0	0	0	NO	NO
ADRA1B	ADRA1B	4	0	0	0	0	NO	NO
ADRA1D	ADRA1D	4	0	0	0	0	NO	NO
ADRA2A	ADRA2A	4	0	0	0	0	NO	NO
ADRA2B	ADRA2B	4	0	0	0	0	NO	NO
ADRA2C	ADRA2C	4	0	0	0	0	NO	NO
ADRB1	ADRB1	4	0	0	0	0	NO	NO
ADRB2	ADRB2	4	0	0	0	0	NO	NO
ADRB3	ADRB3	4	0	0	0	0	NO	NO
ADRBK1	ADRBK1	4	0	0	0	0	NO	NO
ADRBK2	ADRBK2	4	0	0	0	0	NO	NO
ADRM1	ADRM1	4	0	0	0	0	NO	NO
ADSL	ADSL	4	0	0	0	0	NO	NO
ADSS	ADSS	4	1	1	1	1	YES	YES
ADSSL1	ADSSL1	4	0	0	0	0	NO	NO
ADTRP	ADTRP	4	0	0	0	0	NO	NO
AEBP1	AEBP1	4	0	0	1	1	YES	YES
AEBP2	AEBP2	4	0	0	0	0	NO	NO
AEN	AEN	4	0	0	0	0	NO	NO
AES	AES	4	0	0	0	0	NO	NO
AFAP1	AFAP1	4	0	0	0	0	NO	NO
AFAP1L1	AFAP1L1	4	0	0	1	0	YES	NO
AFAP1L2	AFAP1L2	4	0	0	1	0	YES	NO
AFF1	AFF1	4	0	0	0	0	NO	NO
AFF2	AFF2	4	0	0	1	1	YES	YES
AFF3	AFF3	4	0	0	0	0	NO	NO
AFF4	AFF4	4	0	0	0	0	NO	NO
AFG3L2	AFG3L2	4	2	2	1	1	YES	YES
AFM	AFM	4	0	0	0	0	NO	NO
AFMID	AFMID	4	0	0	0	0	NO	NO
AFP	AFP	4	0	0	0	0	NO	NO
AFTPH	AFTPH	4	0	0	0	0	NO	NO
AGA	AGA	4	0	0	0	0	NO	NO
AGAP1	AGAP1	4	0	0	0	0	NO	NO
AGAP2	AGAP2	4	0	0	0	0	NO	NO
AGAP3	AGAP3	4	0	0	0	0	NO	NO
AGBL1	AGBL1	4	0	0	0	0	NO	NO
AGBL2	AGBL2	4	0	0	0	0	NO	NO
AGBL3	AGBL3	4	0	0	0	0	NO	NO
AGBL4	AGBL4	4	0	0	0	0	NO	NO
AGBL5	AGBL5	4	0	0	0	0	NO	NO
AGER	AGER	4	0	0	0	0	NO	NO
AGFG1	AGFG1	4	0	0	0	0	NO	NO
AGFG2	AGFG2	4	0	0	0	0	NO	NO
AGGF1	AGGF1	4	0	0	0	0	NO	NO
AGK	AGK	4	1	1	0	0	YES	YES
AGL	AGL	4	0	0	0	0	NO	NO
AGMAT	AGMAT	4	0	0	0	0	NO	NO
AGMO	AGMO	4	0	0	0	0	NO	NO
AGO1	AGO1	4	0	0	0	0	NO	NO
AGO2	AGO2	4	0	0	0	0	NO	NO
AGO3	AGO3	4	0	0	0	0	NO	NO
AGO4	AGO4	4	0	0	0	0	NO	NO
AGPAT1	AGPAT1	4	0	0	0	0	NO	NO
AGPAT2	AGPAT2	4	0	0	0	0	NO	NO
AGPAT3	AGPAT3	4	0	0	0	0	NO	NO
AGPAT4	AGPAT4	4	0	0	0	0	NO	NO
AGPAT5	AGPAT5	4	0	0	0	0	NO	NO
AGPAT6	AGPAT6	4	0	0	0	0	NO	NO
AGPAT9	AGPAT9	4	0	0	0	0	NO	NO
AGPS	AGPS	4	0	0	0	0	NO	NO
AGR2	AGR2	4	0	0	0	0	NO	NO
AGR3	AGR3	4	0	0	0	0	NO	NO
AGRN	AGRN	4	0	0	0	0	NO	NO
AGRP	AGRP	4	0	0	1	0	YES	NO
AGT	AGT	4	0	0	0	0	NO	NO
AGTPBP1	AGTPBP1	4	0	0	0	0	NO	NO
AGTR1	AGTR1	4	0	0	0	0	NO	NO
AGTR2	AGTR2	4	0	0	0	0	NO	NO
AGTRAP	AGTRAP	4	0	0	0	0	NO	NO
AGXT	AGXT	4	0	0	0	0	NO	NO
AGXT2	AGXT2	4	0	0	0	0	NO	NO
AHCTF1	AHCTF1	4	1	1	1	1	YES	YES
AHCY	AHCY	4	0	0	1	1	YES	YES
AHCYL1	AHCYL1	4	0	0	0	0	NO	NO
AHCYL2	AHCYL2	4	0	0	0	0	NO	NO
AHDC1	AHDC1	4	0	0	0	0	NO	NO
AHI1	AHI1	4	0	0	0	0	NO	NO
AHNAK	AHNAK	4	0	0	2	2	YES	YES
AHNAK2	AHNAK2	4	0	0	4	4	YES	YES
AHR	AHR	4	0	0	0	0	NO	NO
AHRR	AHRR	4	0	0	0	0	NO	NO
AHSA1	AHSA1	4	0	0	0	0	NO	NO
AHSA2	AHSA2	4	0	0	1	1	YES	YES
AHSG	AHSG	4	0	0	0	0	NO	NO
AHSP	AHSP	4	0	0	0	0	NO	NO
AICDA	AICDA	4	0	0	0	0	NO	NO
AIDA	AIDA	4	3	3	2	2	YES	YES
AIF1	AIF1	4	0	0	1	0	YES	NO
AIF1L	AIF1L	4	0	0	0	0	NO	NO
AIFM1	AIFM1	4	0	0	0	0	NO	NO
AIFM2	AIFM2	4	0	0	1	0	YES	NO
AIFM3	AIFM3	4	0	0	0	0	NO	NO
AIG1	AIG1	4	0	0	0	0	NO	NO
AIM1	AIM1	4	0	0	0	0	NO	NO
AIM1L	AIM1L	4	0	0	0	0	NO	NO
AIM2	AIM2	4	0	0	1	0	YES	NO
AIMP1	AIMP1	4	0	0	1	1	YES	YES
AIMP2	AIMP2	4	0	0	0	0	NO	NO
AIP	AIP	4	0	0	0	0	NO	NO
AIPL1	AIPL1	4	0	0	0	0	NO	NO
AIRE	AIRE	4	0	0	0	0	NO	NO
AJAP1	AJAP1	4	0	0	0	0	NO	NO
AJUBA	AJUBA	4	0	0	0	0	NO	NO
AK1	AK1	4	0	0	0	0	NO	NO
AK2	AK2	4	3	3	1	1	YES	YES
AK3	AK3	4	0	0	0	0	NO	NO
AK4	AK4	4	2	2	2	2	YES	YES
AK5	AK5	4	0	0	0	0	NO	NO
AK7	AK7	4	0	0	0	0	NO	NO
AK8	AK8	4	0	0	0	0	NO	NO
AK9	AK9	4	0	0	0	0	NO	NO
AKAP1	AKAP1	4	0	0	0	0	NO	NO
AKAP10	AKAP10	4	0	0	0	0	NO	NO
AKAP11	AKAP11	4	0	0	0	0	NO	NO
AKAP12	AKAP12	4	0	0	0	0	NO	NO
AKAP13	AKAP13	4	0	0	0	0	NO	NO
AKAP14	AKAP14	4	0	0	0	0	NO	NO
AKAP2	AKAP2	2	0	0	0	0	NO	NO
AKAP3	AKAP3	4	0	0	0	0	NO	NO
AKAP4	AKAP4	4	0	0	0	0	NO	NO
AKAP5	AKAP5	4	0	0	1	0	YES	NO
AKAP6	AKAP6	4	0	0	0	0	NO	NO
AKAP7	AKAP7	4	0	0	0	0	NO	NO
AKAP8	AKAP8	4	0	0	0	0	NO	NO
AKAP8L	AKAP8L	4	0	0	1	0	YES	NO
AKAP9	AKAP9	4	0	0	0	0	NO	NO
AKIP1	AKIP1	4	0	0	0	0	NO	NO
AKIRIN1	AKIRIN1	4	0	0	1	1	YES	YES
AKIRIN2	AKIRIN2	4	0	0	1	1	YES	YES
AKNA	AKNA	4	0	0	0	0	NO	NO
AKNAD1	AKNAD1	4	0	0	0	0	NO	NO
AKR1A1	AKR1A1	4	0	0	0	0	NO	NO
AKR1B1	AKR1B1	4	1	1	0	0	YES	YES
AKR1B10	AKR1B10	4	1	1	1	1	YES	YES
AKR1B15	AKR1B15	2	0	0	0	0	NO	NO
AKR1C2	AKR1C2	1	0	0	0	0	NO	NO
AKR1C3	AKR1C3	4	0	0	0	0	NO	NO
AKR1C4	AKR1C4	2	0	0	1	1	YES	YES
AKR1D1	AKR1D1	4	0	0	2	2	YES	YES
AKR1E2	AKR1E2	4	0	0	0	0	NO	NO
AKR7A2	AKR7A2	4	0	0	2	2	YES	YES
AKR7A3	AKR7A3	4	1	1	1	1	YES	YES
AKT1	AKT1	4	0	0	0	0	NO	NO
AKT1S1	AKT1S1	4	0	0	0	0	NO	NO
AKT2	AKT2	4	0	0	0	0	NO	NO
AKT3	AKT3	4	0	0	0	0	NO	NO
AKTIP	AKTIP	4	3	3	1	1	YES	YES
ALAD	ALAD	4	0	0	0	0	NO	NO
ALAS1	ALAS1	4	0	0	0	0	NO	NO
ALAS2	ALAS2	4	0	0	0	0	NO	NO
ALB	ALB	4	0	0	0	0	NO	NO
ALCAM	ALCAM	4	0	0	0	0	NO	NO
ALDH16A1	ALDH16A1	4	0	0	1	0	YES	NO
ALDH18A1	ALDH18A1	4	0	0	0	0	NO	NO
ALDH1A1	ALDH1A1	4	0	0	0	0	NO	NO
ALDH1A2	ALDH1A2	4	0	0	1	0	YES	NO
ALDH1A3	ALDH1A3	4	0	0	0	0	NO	NO
ALDH1B1	ALDH1B1	4	0	0	0	0	NO	NO
ALDH1L1	ALDH1L1	4	0	0	0	0	NO	NO
ALDH1L2	ALDH1L2	4	0	0	0	0	NO	NO
ALDH2	ALDH2	4	0	0	0	0	NO	NO
ALDH3A1	ALDH3A1	4	0	0	0	0	NO	NO
ALDH3A2	ALDH3A2	4	0	0	0	0	NO	NO
ALDH3B2	ALDH3B2	4	0	0	1	1	YES	YES
ALDH4A1	ALDH4A1	4	0	0	1	0	YES	NO
ALDH5A1	ALDH5A1	4	0	0	0	0	NO	NO
ALDH6A1	ALDH6A1	4	0	0	0	0	NO	NO
ALDH7A1	ALDH7A1	4	2	2	0	0	YES	YES
ALDH8A1	ALDH8A1	4	0	0	0	0	NO	NO
ALDH9A1	ALDH9A1	4	0	0	0	0	NO	NO
ALDOA	ALDOA	4	0	0	2	2	YES	YES
ALDOB	ALDOB	4	0	0	0	0	NO	NO
ALDOC	ALDOC	4	0	0	0	0	NO	NO
ALG1	ALG1	4	0	0	0	0	NO	NO
ALG10B	ALG10B	1	0	0	0	0	NO	NO
ALG11	ALG11	4	0	0	1	0	YES	NO
ALG12	ALG12	4	0	0	0	0	NO	NO
ALG13	ALG13	4	0	0	0	0	NO	NO
ALG14	ALG14	4	0	0	0	0	NO	NO
ALG2	ALG2	4	0	0	0	0	NO	NO
ALG3	ALG3	4	0	0	1	1	YES	YES
ALG5	ALG5	4	0	0	0	0	NO	NO
ALG6	ALG6	4	0	0	0	0	NO	NO
ALG8	ALG8	4	0	0	0	0	NO	NO
ALG9	ALG9	4	0	0	0	0	NO	NO
ALK	ALK	4	0	0	0	0	NO	NO
ALKBH1	ALKBH1	4	0	0	0	0	NO	NO
ALKBH2	ALKBH2	4	0	0	0	0	NO	NO
ALKBH3	ALKBH3	4	0	0	0	0	NO	NO
ALKBH4	ALKBH4	4	0	0	0	0	NO	NO
ALKBH5	ALKBH5	4	0	0	0	0	NO	NO
ALKBH6	ALKBH6	4	0	0	0	0	NO	NO
ALKBH7	ALKBH7	4	0	0	0	0	NO	NO
ALKBH8	ALKBH8	4	0	0	1	1	YES	YES
ALLC	ALLC	4	0	0	0	0	NO	NO
ALMS1	ALMS1	4	0	0	2	2	YES	YES
ALOX12	ALOX12	4	0	0	0	0	NO	NO
ALOX12B	ALOX12B	4	0	0	0	0	NO	NO
ALOX15	ALOX15	4	1	1	1	1	YES	YES
ALOX15B	ALOX15B	4	0	0	0	0	NO	NO
ALOX5	ALOX5	4	0	0	0	0	NO	NO
ALOX5AP	ALOX5AP	4	0	0	1	0	YES	NO
ALOXE3	ALOXE3	4	0	0	0	0	NO	NO
ALPI	ALPI	4	0	0	0	0	NO	NO
ALPK1	ALPK1	4	0	0	0	0	NO	NO
ALPK2	ALPK2	4	0	0	0	0	NO	NO
ALPK3	ALPK3	4	0	0	0	0	NO	NO
ALPL	ALPL	4	0	0	0	0	NO	NO
ALPP	ALPP	2	0	0	1	0	YES	NO
ALPPL2	ALPPL2	2	0	0	0	0	NO	NO
ALS2	ALS2	4	0	0	0	0	NO	NO
ALS2CL	ALS2CL	4	0	0	0	0	NO	NO
ALS2CR11	ALS2CR11	4	0	0	0	0	NO	NO
ALS2CR12	ALS2CR12	4	0	0	0	0	NO	NO
ALX1	ALX1	4	0	0	0	0	NO	NO
ALX3	ALX3	4	0	0	0	0	NO	NO
ALX4	ALX4	4	0	0	0	0	NO	NO
ALYREF	ALYREF	4	0	0	1	1	YES	YES
AMACR	AMACR	4	0	0	0	0	NO	NO
AMBN	AMBN	4	0	0	0	0	NO	NO
AMBP	AMBP	4	0	0	0	0	NO	NO
AMBRA1	AMBRA1	4	0	0	0	0	NO	NO
AMD1	AMD1	4	0	0	0	0	NO	NO
AMDHD1	AMDHD1	4	0	0	0	0	NO	NO
AMDHD2	AMDHD2	4	0	0	0	0	NO	NO
AMELX	AMELX	4	0	0	0	0	NO	NO
AMELY	AMELY	4	0	0	0	0	NO	NO
AMER1	AMER1	4	0	0	0	0	NO	NO
AMER2	AMER2	4	0	0	0	0	NO	NO
AMER3	AMER3	4	0	0	0	0	NO	NO
AMFR	AMFR	4	0	0	0	0	NO	NO
AMH	AMH	4	0	0	0	0	NO	NO
AMHR2	AMHR2	4	0	0	1	0	YES	NO
AMICA1	AMICA1	4	0	0	0	0	NO	NO
AMIGO1	AMIGO1	4	0	0	0	0	NO	NO
AMIGO2	AMIGO2	4	0	0	1	0	YES	NO
AMMECR1	AMMECR1	4	0	0	0	0	NO	NO
AMMECR1L	AMMECR1L	4	0	0	0	0	NO	NO
AMN	AMN	4	0	0	0	0	NO	NO
AMN1	AMN1	4	0	0	0	0	NO	NO
AMOT	AMOT	4	0	0	1	0	YES	NO
AMOTL1	AMOTL1	4	0	0	0	0	NO	NO
AMOTL2	AMOTL2	4	0	0	0	0	NO	NO
AMPD1	AMPD1	4	1	0	0	0	YES	NO
AMPD2	AMPD2	4	0	0	0	0	NO	NO
AMPD3	AMPD3	4	0	0	0	0	NO	NO
AMPH	AMPH	4	0	0	0	0	NO	NO
AMT	AMT	4	0	0	0	0	NO	NO
AMTN	AMTN	4	0	0	1	0	YES	NO
AMZ1	AMZ1	4	0	0	0	0	NO	NO
AMZ2	AMZ2	4	2	2	1	1	YES	YES
ANAPC1	ANAPC1	4	3	3	2	1	YES	YES
ANAPC10	ANAPC10	4	0	0	2	2	YES	YES
ANAPC11	ANAPC11	4	0	0	0	0	NO	NO
ANAPC13	ANAPC13	4	0	0	1	0	YES	NO
ANAPC15	ANAPC15	4	0	0	1	1	YES	YES
ANAPC16	ANAPC16	4	0	0	0	0	NO	NO
ANAPC2	ANAPC2	4	0	0	0	0	NO	NO
ANAPC4	ANAPC4	4	0	0	0	0	NO	NO
ANAPC5	ANAPC5	4	0	0	0	0	NO	NO
ANAPC7	ANAPC7	4	0	0	0	0	NO	NO
ANG	ANG	4	0	0	0	0	NO	NO
ANGEL1	ANGEL1	4	0	0	1	0	YES	NO
ANGEL2	ANGEL2	4	0	0	0	0	NO	NO
ANGPT1	ANGPT1	3	0	0	0	0	NO	NO
ANGPT2	ANGPT2	4	0	0	0	0	NO	NO
ANGPT4	ANGPT4	4	0	0	0	0	NO	NO
ANGPTL1	ANGPTL1	4	0	0	0	0	NO	NO
ANGPTL2	ANGPTL2	4	0	0	0	0	NO	NO
ANGPTL3	ANGPTL3	4	0	0	0	0	NO	NO
ANGPTL4	ANGPTL4	4	0	0	0	0	NO	NO
ANGPTL5	ANGPTL5	4	0	0	0	0	NO	NO
ANGPTL6	ANGPTL6	4	0	0	1	0	YES	NO
ANGPTL7	ANGPTL7	4	0	0	0	0	NO	NO
ANHX	ANHX	4	0	0	0	0	NO	NO
ANK1	ANK1	4	0	0	1	0	YES	NO
ANK2	ANK2	4	0	0	0	0	NO	NO
ANK3	ANK3	4	0	0	0	0	NO	NO
ANKAR	ANKAR	4	0	0	0	0	NO	NO
ANKDD1A	ANKDD1A	4	0	0	1	0	YES	NO
ANKDD1B	ANKDD1B	4	0	0	1	0	YES	NO
ANKEF1	ANKEF1	4	0	0	0	0	NO	NO
ANKFN1	ANKFN1	4	0	0	0	0	NO	NO
ANKFY1	ANKFY1	4	0	0	0	0	NO	NO
ANKH	ANKH	4	0	0	0	0	NO	NO
ANKHD1	ANKHD1	1	0	0	0	0	NO	NO
ANKHD1-EIF4EBP3	ANKHD1-EIF4EBP3	4	0	0	0	0	NO	NO
ANKIB1	ANKIB1	4	0	0	0	0	NO	NO
ANKK1	ANKK1	4	0	0	0	0	NO	NO
ANKLE1	ANKLE1	4	0	0	0	0	NO	NO
ANKLE2	ANKLE2	4	0	0	0	0	NO	NO
ANKMY1	ANKMY1	4	0	0	1	0	YES	NO
ANKMY2	ANKMY2	4	0	0	0	0	NO	NO
ANKRA2	ANKRA2	4	0	0	0	0	NO	NO
ANKRD1	ANKRD1	4	0	0	0	0	NO	NO
ANKRD10	ANKRD10	4	0	0	0	0	NO	NO
ANKRD11	ANKRD11	4	0	0	0	0	NO	NO
ANKRD12	ANKRD12	4	0	0	0	0	NO	NO
ANKRD13A	ANKRD13A	4	0	0	0	0	NO	NO
ANKRD13B	ANKRD13B	4	0	0	0	0	NO	NO
ANKRD13C	ANKRD13C	4	0	0	0	0	NO	NO
ANKRD13D	ANKRD13D	4	0	0	0	0	NO	NO
ANKRD16	ANKRD16	4	0	0	0	0	NO	NO
ANKRD17	ANKRD17	4	0	0	0	0	NO	NO
ANKRD18A	ANKRD18A	1	0	0	0	0	NO	NO
ANKRD18B	ANKRD18B	1	0	0	0	0	NO	NO
ANKRD2	ANKRD2	4	0	0	0	0	NO	NO
ANKRD22	ANKRD22	4	0	0	0	0	NO	NO
ANKRD23	ANKRD23	4	0	0	0	0	NO	NO
ANKRD24	ANKRD24	4	0	0	0	0	NO	NO
ANKRD26	ANKRD26	4	0	0	0	0	NO	NO
ANKRD27	ANKRD27	4	0	0	0	0	NO	NO
ANKRD28	ANKRD28	4	0	0	0	0	NO	NO
ANKRD29	ANKRD29	4	0	0	0	0	NO	NO
ANKRD30A	ANKRD30A	4	0	0	0	0	NO	NO
ANKRD30B	ANKRD30B	4	0	0	3	3	YES	YES
ANKRD30BL	ANKRD30BL	1	0	0	0	0	NO	NO
ANKRD31	ANKRD31	4	0	0	0	0	NO	NO
ANKRD32	ANKRD32	4	0	0	0	0	NO	NO
ANKRD33	ANKRD33	4	0	0	0	0	NO	NO
ANKRD33B	ANKRD33B	4	0	0	0	0	NO	NO
ANKRD34A	ANKRD34A	4	0	0	0	0	NO	NO
ANKRD34B	ANKRD34B	4	0	0	0	0	NO	NO
ANKRD34C	ANKRD34C	4	0	0	0	0	NO	NO
ANKRD35	ANKRD35	4	0	0	0	0	NO	NO
ANKRD36	ANKRD36	2	0	0	1	1	YES	YES
ANKRD36C	ANKRD36C	4	0	0	1	1	YES	YES
ANKRD37	ANKRD37	4	0	0	0	0	NO	NO
ANKRD39	ANKRD39	4	1	1	0	0	YES	YES
ANKRD40	ANKRD40	4	0	0	0	0	NO	NO
ANKRD42	ANKRD42	4	0	0	0	0	NO	NO
ANKRD44	ANKRD44	4	0	0	0	0	NO	NO
ANKRD45	ANKRD45	4	0	0	0	0	NO	NO
ANKRD46	ANKRD46	4	0	0	0	0	NO	NO
ANKRD49	ANKRD49	4	0	0	1	1	YES	YES
ANKRD50	ANKRD50	4	0	0	0	0	NO	NO
ANKRD52	ANKRD52	4	0	0	0	0	NO	NO
ANKRD53	ANKRD53	4	0	0	0	0	NO	NO
ANKRD54	ANKRD54	4	0	0	0	0	NO	NO
ANKRD55	ANKRD55	4	0	0	0	0	NO	NO
ANKRD6	ANKRD6	4	0	0	0	0	NO	NO
ANKRD61	ANKRD61	4	0	0	0	0	NO	NO
ANKRD62	ANKRD62	4	1	1	1	0	YES	YES
ANKRD63	ANKRD63	4	0	0	0	0	NO	NO
ANKRD65	ANKRD65	4	0	0	0	0	NO	NO
ANKRD66	ANKRD66	4	0	0	0	0	NO	NO
ANKRD7	ANKRD7	4	0	0	0	0	NO	NO
ANKRD9	ANKRD9	4	0	0	0	0	NO	NO
ANKS1A	ANKS1A	4	0	0	0	0	NO	NO
ANKS1B	ANKS1B	4	0	0	0	0	NO	NO
ANKS3	ANKS3	4	0	0	0	0	NO	NO
ANKS4B	ANKS4B	4	0	0	1	0	YES	NO
ANKS6	ANKS6	4	0	0	0	0	NO	NO
ANKUB1	ANKUB1	4	0	0	2	0	YES	NO
ANKZF1	ANKZF1	4	0	0	0	0	NO	NO
ANLN	ANLN	4	0	0	0	0	NO	NO
ANO1	ANO1	4	0	0	0	0	NO	NO
ANO10	ANO10	4	0	0	0	0	NO	NO
ANO2	ANO2	4	0	0	0	0	NO	NO
ANO3	ANO3	4	0	0	0	0	NO	NO
ANO4	ANO4	4	0	0	0	0	NO	NO
ANO5	ANO5	4	0	0	0	0	NO	NO
ANO6	ANO6	4	0	0	0	0	NO	NO
ANO7	ANO7	4	0	0	0	0	NO	NO
ANO8	ANO8	4	0	0	0	0	NO	NO
ANO9	ANO9	4	0	0	1	0	YES	NO
ANP32A	ANP32A	4	1	1	1	1	YES	YES
ANP32B	ANP32B	4	1	1	1	1	YES	YES
ANP32D	ANP32D	1	0	0	0	0	NO	NO
ANP32E	ANP32E	4	0	0	0	0	NO	NO
ANPEP	ANPEP	4	0	0	0	0	NO	NO
ANTXR1	ANTXR1	4	0	0	0	0	NO	NO
ANTXR2	ANTXR2	4	0	0	0	0	NO	NO
ANTXRL	ANTXRL	4	0	0	0	0	NO	NO
ANXA1	ANXA1	4	0	0	0	0	NO	NO
ANXA10	ANXA10	4	0	0	0	0	NO	NO
ANXA11	ANXA11	4	0	0	0	0	NO	NO
ANXA13	ANXA13	4	0	0	0	0	NO	NO
ANXA2	ANXA2	4	3	3	2	2	YES	YES
ANXA2R	ANXA2R	4	0	0	1	0	YES	NO
ANXA3	ANXA3	4	0	0	0	0	NO	NO
ANXA4	ANXA4	4	0	0	0	0	NO	NO
ANXA5	ANXA5	4	0	0	0	0	NO	NO
ANXA6	ANXA6	4	0	0	0	0	NO	NO
ANXA7	ANXA7	4	0	0	0	0	NO	NO
ANXA9	ANXA9	4	0	0	1	0	YES	NO
AOAH	AOAH	4	0	0	0	0	NO	NO
AOC1	AOC1	4	0	0	0	0	NO	NO
AOC2	AOC2	4	0	0	0	0	NO	NO
AOC3	AOC3	4	2	2	0	0	YES	YES
AOX1	AOX1	4	0	0	0	0	NO	NO
AP001816.1	AP001816.1	4	0	0	0	0	NO	NO
AP003774.4	AP003774.4	4	0	0	0	0	NO	NO
AP1AR	AP1AR	4	0	0	0	0	NO	NO
AP1B1	AP1B1	4	1	1	2	2	YES	YES
AP1G1	AP1G1	4	0	0	0	0	NO	NO
AP1G2	AP1G2	4	0	0	0	0	NO	NO
AP1M1	AP1M1	4	0	0	0	0	NO	NO
AP1M2	AP1M2	4	0	0	0	0	NO	NO
AP1S1	AP1S1	4	0	0	0	0	NO	NO
AP1S2	AP1S2	4	2	2	1	1	YES	YES
AP1S3	AP1S3	4	0	0	0	0	NO	NO
AP2A1	AP2A1	4	0	0	0	0	NO	NO
AP2A2	AP2A2	4	0	0	0	0	NO	NO
AP2B1	AP2B1	4	2	2	1	1	YES	YES
AP2M1	AP2M1	4	0	0	1	0	YES	NO
AP2S1	AP2S1	4	0	0	0	0	NO	NO
AP3B1	AP3B1	4	0	0	1	1	YES	YES
AP3B2	AP3B2	4	0	0	0	0	NO	NO
AP3D1	AP3D1	4	0	0	1	0	YES	NO
AP3M1	AP3M1	4	0	0	0	0	NO	NO
AP3M2	AP3M2	4	0	0	0	0	NO	NO
AP3S1	AP3S1	4	2	2	4	4	YES	YES
AP3S2	AP3S2	3	0	0	0	0	NO	NO
AP4B1	AP4B1	4	0	0	0	0	NO	NO
AP4E1	AP4E1	4	0	0	0	0	NO	NO
AP4M1	AP4M1	4	0	0	0	0	NO	NO
AP4S1	AP4S1	4	0	0	2	1	YES	YES
AP5B1	AP5B1	4	0	0	0	0	NO	NO
AP5M1	AP5M1	4	0	0	0	0	NO	NO
AP5S1	AP5S1	4	0	0	0	0	NO	NO
AP5Z1	AP5Z1	4	0	0	0	0	NO	NO
APAF1	APAF1	4	0	0	0	0	NO	NO
APBA1	APBA1	4	0	0	0	0	NO	NO
APBA2	APBA2	4	0	0	1	1	YES	YES
APBA3	APBA3	4	0	0	0	0	NO	NO
APBB1	APBB1	4	0	0	0	0	NO	NO
APBB1IP	APBB1IP	4	0	0	0	0	NO	NO
APBB2	APBB2	4	0	0	0	0	NO	NO
APBB3	APBB3	4	0	0	0	0	NO	NO
APC	APC	4	0	0	0	0	NO	NO
APC2	APC2	4	0	0	0	0	NO	NO
APCDD1	APCDD1	4	0	0	0	0	NO	NO
APCDD1L	APCDD1L	4	0	0	0	0	NO	NO
APCS	APCS	4	0	0	0	0	NO	NO
APEH	APEH	4	0	0	0	0	NO	NO
APEX1	APEX1	4	0	0	1	1	YES	YES
APEX2	APEX2	4	0	0	0	0	NO	NO
APH1A	APH1A	4	0	0	0	0	NO	NO
APH1B	APH1B	4	0	0	0	0	NO	NO
API5	API5	4	3	3	3	3	YES	YES
APIP	APIP	4	1	1	1	1	YES	YES
APLF	APLF	4	0	0	0	0	NO	NO
APLN	APLN	4	0	0	1	0	YES	NO
APLNR	APLNR	4	0	0	0	0	NO	NO
APLP1	APLP1	4	0	0	0	0	NO	NO
APLP2	APLP2	4	0	0	0	0	NO	NO
APMAP	APMAP	4	0	0	0	0	NO	NO
APOA1	APOA1	4	0	0	0	0	NO	NO
APOA1BP	APOA1BP	4	1	1	0	0	YES	YES
APOA2	APOA2	4	0	0	0	0	NO	NO
APOA4	APOA4	4	0	0	0	0	NO	NO
APOA5	APOA5	4	0	0	0	0	NO	NO
APOB	APOB	4	0	0	0	0	NO	NO
APOBEC1	APOBEC1	4	0	0	0	0	NO	NO
APOBEC2	APOBEC2	4	0	0	0	0	NO	NO
APOBEC3A	APOBEC3A	4	0	0	0	0	NO	NO
APOBEC3B	APOBEC3B	4	0	0	0	0	NO	NO
APOBEC3C	APOBEC3C	4	0	0	2	2	YES	YES
APOBEC3D	APOBEC3D	4	0	0	0	0	NO	NO
APOBEC3F	APOBEC3F	4	0	0	0	0	NO	NO
APOBEC3G	APOBEC3G	4	0	0	1	0	YES	NO
APOBEC3H	APOBEC3H	4	0	0	0	0	NO	NO
APOBEC4	APOBEC4	4	0	0	0	0	NO	NO
APOBR	APOBR	4	0	0	0	0	NO	NO
APOC1	APOC1	4	2	2	0	0	YES	YES
APOC3	APOC3	4	0	0	0	0	NO	NO
APOC4	APOC4	4	0	0	0	0	NO	NO
APOD	APOD	4	0	0	0	0	NO	NO
APOE	APOE	4	0	0	0	0	NO	NO
APOF	APOF	4	0	0	0	0	NO	NO
APOH	APOH	4	0	0	0	0	NO	NO
APOL1	APOL1	4	0	0	0	0	NO	NO
APOL2	APOL2	4	0	0	1	1	YES	YES
APOL3	APOL3	4	0	0	0	0	NO	NO
APOL4	APOL4	1	0	0	1	0	YES	NO
APOL5	APOL5	4	0	0	0	0	NO	NO
APOL6	APOL6	4	0	0	1	0	YES	NO
APOLD1	APOLD1	4	0	0	0	0	NO	NO
APOM	APOM	4	0	0	0	0	NO	NO
APOO	APOO	4	0	0	1	1	YES	YES
APOOL	APOOL	4	2	2	0	0	YES	YES
APOPT1	APOPT1	2	0	0	0	0	NO	NO
APP	APP	4	0	0	0	0	NO	NO
APPBP2	APPBP2	4	0	0	0	0	NO	NO
APPL1	APPL1	4	0	0	0	0	NO	NO
APPL2	APPL2	4	0	0	0	0	NO	NO
APRT	APRT	4	0	0	0	0	NO	NO
APTX	APTX	4	0	0	0	0	NO	NO
AQP1	AQP1	4	0	0	0	0	NO	NO
AQP10	AQP10	4	2	2	0	0	YES	YES
AQP11	AQP11	4	0	0	0	0	NO	NO
AQP2	AQP2	4	0	0	0	0	NO	NO
AQP3	AQP3	4	0	0	0	0	NO	NO
AQP4	AQP4	4	0	0	0	0	NO	NO
AQP5	AQP5	4	0	0	0	0	NO	NO
AQP6	AQP6	4	0	0	0	0	NO	NO
AQP8	AQP8	4	0	0	0	0	NO	NO
AQP9	AQP9	4	0	0	0	0	NO	NO
AQPEP	AQPEP	4	0	0	0	0	NO	NO
AQR	AQR	4	0	0	0	0	NO	NO
AR	AR	4	0	0	0	0	NO	NO
ARAF	ARAF	4	0	0	0	0	NO	NO
ARAP1	ARAP1	4	0	0	0	0	NO	NO
ARAP2	ARAP2	4	0	0	0	0	NO	NO
ARAP3	ARAP3	4	0	0	0	0	NO	NO
ARC	ARC	4	0	0	0	0	NO	NO
ARCN1	ARCN1	4	0	0	0	0	NO	NO
AREL1	AREL1	4	0	0	0	0	NO	NO
ARF1	ARF1	4	0	0	2	2	YES	YES
ARF3	ARF3	4	0	0	0	0	NO	NO
ARF4	ARF4	4	4	4	0	0	YES	YES
ARF5	ARF5	4	0	0	0	0	NO	NO
ARF6	ARF6	4	0	0	2	2	YES	YES
ARFGAP1	ARFGAP1	4	0	0	0	0	NO	NO
ARFGAP2	ARFGAP2	4	0	0	0	0	NO	NO
ARFGAP3	ARFGAP3	4	0	0	0	0	NO	NO
ARFGEF1	ARFGEF1	4	0	0	0	0	NO	NO
ARFGEF2	ARFGEF2	4	0	0	0	0	NO	NO
ARFIP1	ARFIP1	4	0	0	0	0	NO	NO
ARFIP2	ARFIP2	4	0	0	0	0	NO	NO
ARFRP1	ARFRP1	4	0	0	0	0	NO	NO
ARG1	ARG1	4	0	0	0	0	NO	NO
ARG2	ARG2	4	0	0	0	0	NO	NO
ARGFX	ARGFX	4	1	1	1	1	YES	YES
ARGLU1	ARGLU1	4	0	0	0	0	NO	NO
ARHGAP1	ARHGAP1	4	0	0	0	0	NO	NO
ARHGAP10	ARHGAP10	4	0	0	0	0	NO	NO
ARHGAP11A	ARHGAP11A	4	0	0	1	0	YES	NO
ARHGAP12	ARHGAP12	4	0	0	0	0	NO	NO
ARHGAP15	ARHGAP15	4	0	0	1	1	YES	YES
ARHGAP17	ARHGAP17	4	0	0	0	0	NO	NO
ARHGAP18	ARHGAP18	4	0	0	0	0	NO	NO
ARHGAP19	ARHGAP19	4	0	0	0	0	NO	NO
ARHGAP20	ARHGAP20	4	0	0	1	1	YES	YES
ARHGAP21	ARHGAP21	4	0	0	2	2	YES	YES
ARHGAP22	ARHGAP22	4	0	0	0	0	NO	NO
ARHGAP23	ARHGAP23	4	0	0	0	0	NO	NO
ARHGAP24	ARHGAP24	4	0	0	0	0	NO	NO
ARHGAP25	ARHGAP25	4	0	0	0	0	NO	NO
ARHGAP26	ARHGAP26	4	0	0	0	0	NO	NO
ARHGAP27	ARHGAP27	4	0	0	0	0	NO	NO
ARHGAP28	ARHGAP28	4	0	0	0	0	NO	NO
ARHGAP29	ARHGAP29	4	0	0	0	0	NO	NO
ARHGAP30	ARHGAP30	4	0	0	0	0	NO	NO
ARHGAP31	ARHGAP31	4	0	0	0	0	NO	NO
ARHGAP32	ARHGAP32	4	0	0	0	0	NO	NO
ARHGAP33	ARHGAP33	4	0	0	0	0	NO	NO
ARHGAP35	ARHGAP35	4	0	0	0	0	NO	NO
ARHGAP36	ARHGAP36	4	0	0	0	0	NO	NO
ARHGAP39	ARHGAP39	4	0	0	0	0	NO	NO
ARHGAP4	ARHGAP4	4	0	0	1	0	YES	NO
ARHGAP42	ARHGAP42	3	3	3	0	0	YES	YES
ARHGAP44	ARHGAP44	4	0	0	0	0	NO	NO
ARHGAP5	ARHGAP5	4	3	3	1	1	YES	YES
ARHGAP6	ARHGAP6	4	0	0	0	0	NO	NO
ARHGAP8	ARHGAP8	4	0	0	0	0	NO	NO
ARHGAP9	ARHGAP9	4	0	0	0	0	NO	NO
ARHGDIA	ARHGDIA	4	0	0	0	0	NO	NO
ARHGDIB	ARHGDIB	4	0	0	0	0	NO	NO
ARHGDIG	ARHGDIG	4	0	0	0	0	NO	NO
ARHGEF1	ARHGEF1	4	0	0	0	0	NO	NO
ARHGEF10	ARHGEF10	4	0	0	0	0	NO	NO
ARHGEF10L	ARHGEF10L	4	0	0	0	0	NO	NO
ARHGEF11	ARHGEF11	4	0	0	0	0	NO	NO
ARHGEF12	ARHGEF12	4	0	0	0	0	NO	NO
ARHGEF15	ARHGEF15	4	0	0	0	0	NO	NO
ARHGEF16	ARHGEF16	4	0	0	0	0	NO	NO
ARHGEF17	ARHGEF17	4	0	0	0	0	NO	NO
ARHGEF18	ARHGEF18	4	0	0	0	0	NO	NO
ARHGEF19	ARHGEF19	4	0	0	0	0	NO	NO
ARHGEF2	ARHGEF2	4	0	0	0	0	NO	NO
ARHGEF25	ARHGEF25	4	0	0	0	0	NO	NO
ARHGEF26	ARHGEF26	4	0	0	0	0	NO	NO
ARHGEF28	ARHGEF28	4	0	0	0	0	NO	NO
ARHGEF3	ARHGEF3	4	0	0	0	0	NO	NO
ARHGEF33	ARHGEF33	4	0	0	0	0	NO	NO
ARHGEF37	ARHGEF37	4	0	0	0	0	NO	NO
ARHGEF38	ARHGEF38	4	0	0	0	0	NO	NO
ARHGEF39	ARHGEF39	4	0	0	0	0	NO	NO
ARHGEF4	ARHGEF4	4	0	0	0	0	NO	NO
ARHGEF40	ARHGEF40	4	0	0	0	0	NO	NO
ARHGEF5	ARHGEF5	4	4	4	0	0	YES	YES
ARHGEF6	ARHGEF6	4	0	0	0	0	NO	NO
ARHGEF7	ARHGEF7	4	0	0	0	0	NO	NO
ARHGEF9	ARHGEF9	4	0	0	0	0	NO	NO
ARID1A	ARID1A	4	0	0	0	0	NO	NO
ARID1B	ARID1B	4	0	0	0	0	NO	NO
ARID2	ARID2	4	0	0	0	0	NO	NO
ARID3A	ARID3A	4	0	0	0	0	NO	NO
ARID3B	ARID3B	4	3	3	0	0	YES	YES
ARID3C	ARID3C	4	0	0	0	0	NO	NO
ARID4A	ARID4A	4	0	0	0	0	NO	NO
ARID4B	ARID4B	4	0	0	0	0	NO	NO
ARID5A	ARID5A	4	0	0	0	0	NO	NO
ARID5B	ARID5B	4	0	0	0	0	NO	NO
ARIH1	ARIH1	4	0	0	0	0	NO	NO
ARIH2	ARIH2	4	1	1	2	2	YES	YES
ARIH2OS	ARIH2OS	4	0	0	0	0	NO	NO
ARL1	ARL1	4	0	0	0	0	NO	NO
ARL10	ARL10	4	0	0	0	0	NO	NO
ARL11	ARL11	4	0	0	0	0	NO	NO
ARL13A	ARL13A	4	0	0	0	0	NO	NO
ARL13B	ARL13B	4	0	0	0	0	NO	NO
ARL14	ARL14	4	0	0	0	0	NO	NO
ARL14EP	ARL14EP	4	0	0	1	1	YES	YES
ARL15	ARL15	4	0	0	0	0	NO	NO
ARL16	ARL16	4	0	0	1	1	YES	YES
ARL2	ARL2	4	0	0	0	0	NO	NO
ARL2BP	ARL2BP	2	0	0	1	1	YES	YES
ARL3	ARL3	4	0	0	0	0	NO	NO
ARL4A	ARL4A	2	2	2	0	0	YES	YES
ARL4C	ARL4C	4	0	0	0	0	NO	NO
ARL4D	ARL4D	4	0	0	0	0	NO	NO
ARL5A	ARL5A	3	1	1	2	2	YES	YES
ARL5B	ARL5B	4	0	0	0	0	NO	NO
ARL5C	ARL5C	4	0	0	0	0	NO	NO
ARL6	ARL6	3	0	0	0	0	NO	NO
ARL6IP1	ARL6IP1	4	0	0	0	0	NO	NO
ARL6IP4	ARL6IP4	4	0	0	0	0	NO	NO
ARL6IP5	ARL6IP5	4	0	0	0	0	NO	NO
ARL6IP6	ARL6IP6	4	0	0	0	0	NO	NO
ARL8A	ARL8A	4	0	0	0	0	NO	NO
ARL8B	ARL8B	4	3	3	0	0	YES	YES
ARL9	ARL9	4	0	0	0	0	NO	NO
ARMC1	ARMC1	4	0	0	0	0	NO	NO
ARMC10	ARMC10	4	3	3	0	0	YES	YES
ARMC12	ARMC12	4	0	0	0	0	NO	NO
ARMC2	ARMC2	4	0	0	0	0	NO	NO
ARMC3	ARMC3	4	0	0	1	0	YES	NO
ARMC4	ARMC4	4	1	1	0	0	YES	YES
ARMC5	ARMC5	4	0	0	0	0	NO	NO
ARMC6	ARMC6	4	0	0	0	0	NO	NO
ARMC7	ARMC7	4	0	0	0	0	NO	NO
ARMC8	ARMC8	4	0	0	0	0	NO	NO
ARMC9	ARMC9	4	0	0	0	0	NO	NO
ARMCX1	ARMCX1	4	0	0	0	0	NO	NO
ARMCX2	ARMCX2	4	0	0	0	0	NO	NO
ARMCX3	ARMCX3	4	0	0	0	0	NO	NO
ARMCX4	ARMCX4	4	0	0	2	2	YES	YES
ARMCX5	ARMCX5	4	0	0	0	0	NO	NO
ARMCX6	ARMCX6	4	1	1	0	0	YES	YES
ARMS2	ARMS2	4	0	0	0	0	NO	NO
ARNT	ARNT	4	0	0	0	0	NO	NO
ARNT2	ARNT2	4	0	0	0	0	NO	NO
ARNTL	ARNTL	4	0	0	0	0	NO	NO
ARNTL2	ARNTL2	4	0	0	0	0	NO	NO
ARPC1A	ARPC1A	4	0	0	2	2	YES	YES
ARPC1B	ARPC1B	4	0	0	0	0	NO	NO
ARPC2	ARPC2	4	0	0	0	0	NO	NO
ARPC3	ARPC3	4	0	0	1	1	YES	YES
ARPC4	ARPC4	4	0	0	0	0	NO	NO
ARPC5	ARPC5	4	0	0	0	0	NO	NO
ARPC5L	ARPC5L	4	0	0	0	0	NO	NO
ARPP19	ARPP19	4	0	0	3	3	YES	YES
ARPP21	ARPP21	4	0	0	0	0	NO	NO
ARR3	ARR3	4	0	0	0	0	NO	NO
ARRB1	ARRB1	4	0	0	0	0	NO	NO
ARRB2	ARRB2	4	0	0	0	0	NO	NO
ARRDC1	ARRDC1	4	0	0	0	0	NO	NO
ARRDC2	ARRDC2	4	0	0	0	0	NO	NO
ARRDC3	ARRDC3	4	0	0	0	0	NO	NO
ARRDC4	ARRDC4	4	0	0	0	0	NO	NO
ARRDC5	ARRDC5	4	0	0	0	0	NO	NO
ARSA	ARSA	4	0	0	0	0	NO	NO
ARSB	ARSB	4	0	0	0	0	NO	NO
ARSD	ARSD	4	2	2	3	1	YES	YES
ARSE	ARSE	4	0	0	0	0	NO	NO
ARSF	ARSF	4	0	0	0	0	NO	NO
ARSG	ARSG	4	0	0	0	0	NO	NO
ARSH	ARSH	4	0	0	0	0	NO	NO
ARSI	ARSI	4	0	0	0	0	NO	NO
ARSJ	ARSJ	4	0	0	0	0	NO	NO
ARSK	ARSK	4	0	0	0	0	NO	NO
ART1	ART1	4	0	0	0	0	NO	NO
ART3	ART3	4	0	0	1	0	YES	NO
ART4	ART4	4	0	0	0	0	NO	NO
ART5	ART5	4	0	0	0	0	NO	NO
ARTN	ARTN	4	0	0	0	0	NO	NO
ARV1	ARV1	4	0	0	0	0	NO	NO
ARVCF	ARVCF	4	0	0	0	0	NO	NO
ARX	ARX	4	0	0	0	0	NO	NO
AS3MT	AS3MT	4	0	0	0	0	NO	NO
ASAH1	ASAH1	4	0	0	0	0	NO	NO
ASAH2	ASAH2	4	0	0	1	1	YES	YES
ASAP1	ASAP1	4	0	0	0	0	NO	NO
ASAP2	ASAP2	4	0	0	1	0	YES	NO
ASAP3	ASAP3	4	0	0	0	0	NO	NO
ASB1	ASB1	4	0	0	0	0	NO	NO
ASB10	ASB10	4	0	0	0	0	NO	NO
ASB11	ASB11	4	0	0	0	0	NO	NO
ASB12	ASB12	4	0	0	0	0	NO	NO
ASB13	ASB13	4	0	0	0	0	NO	NO
ASB14	ASB14	4	0	0	0	0	NO	NO
ASB15	ASB15	4	0	0	0	0	NO	NO
ASB16	ASB16	4	0	0	0	0	NO	NO
ASB17	ASB17	4	0	0	0	0	NO	NO
ASB18	ASB18	4	0	0	0	0	NO	NO
ASB2	ASB2	4	0	0	0	0	NO	NO
ASB4	ASB4	4	0	0	0	0	NO	NO
ASB5	ASB5	4	0	0	0	0	NO	NO
ASB6	ASB6	4	0	0	0	0	NO	NO
ASB7	ASB7	4	0	0	0	0	NO	NO
ASB8	ASB8	4	0	0	0	0	NO	NO
ASB9	ASB9	4	0	0	2	2	YES	YES
ASCC1	ASCC1	4	0	0	0	0	NO	NO
ASCC2	ASCC2	4	0	0	0	0	NO	NO
ASCC3	ASCC3	4	0	0	0	0	NO	NO
ASCL1	ASCL1	4	0	0	0	0	NO	NO
ASCL2	ASCL2	4	0	0	0	0	NO	NO
ASCL3	ASCL3	4	0	0	0	0	NO	NO
ASCL4	ASCL4	4	0	0	0	0	NO	NO
ASCL5	ASCL5	4	0	0	0	0	NO	NO
ASF1A	ASF1A	4	0	0	0	0	NO	NO
ASF1B	ASF1B	4	0	0	0	0	NO	NO
ASGR1	ASGR1	4	0	0	0	0	NO	NO
ASGR2	ASGR2	4	0	0	1	0	YES	NO
ASH1L	ASH1L	4	0	0	0	0	NO	NO
ASH2L	ASH2L	4	0	0	0	0	NO	NO
ASIC1	ASIC1	4	0	0	0	0	NO	NO
ASIC2	ASIC2	4	0	0	0	0	NO	NO
ASIC3	ASIC3	4	0	0	0	0	NO	NO
ASIC4	ASIC4	4	0	0	0	0	NO	NO
ASIC5	ASIC5	4	0	0	1	0	YES	NO
ASIP	ASIP	4	0	0	0	0	NO	NO
ASL	ASL	4	0	0	0	0	NO	NO
ASNA1	ASNA1	4	0	0	3	3	YES	YES
ASNS	ASNS	4	1	1	2	2	YES	YES
ASNSD1	ASNSD1	4	0	0	1	0	YES	NO
ASPA	ASPA	4	0	0	0	0	NO	NO
ASPDH	ASPDH	4	0	0	0	0	NO	NO
ASPG	ASPG	4	0	0	0	0	NO	NO
ASPH	ASPH	4	0	0	0	0	NO	NO
ASPHD1	ASPHD1	4	0	0	0	0	NO	NO
ASPHD2	ASPHD2	4	0	0	0	0	NO	NO
ASPM	ASPM	4	0	0	0	0	NO	NO
ASPN	ASPN	4	0	0	0	0	NO	NO
ASPRV1	ASPRV1	4	0	0	0	0	NO	NO
ASPSCR1	ASPSCR1	4	0	0	0	0	NO	NO
ASRGL1	ASRGL1	4	0	0	0	0	NO	NO
ASS1	ASS1	4	0	0	0	0	NO	NO
ASTE1	ASTE1	4	0	0	0	0	NO	NO
ASTL	ASTL	4	0	0	1	0	YES	NO
ASTN1	ASTN1	4	0	0	0	0	NO	NO
ASTN2	ASTN2	4	0	0	0	0	NO	NO
ASUN	ASUN	4	0	0	0	0	NO	NO
ASXL1	ASXL1	4	0	0	0	0	NO	NO
ASXL2	ASXL2	4	0	0	0	0	NO	NO
ASXL3	ASXL3	4	0	0	0	0	NO	NO
ASZ1	ASZ1	4	0	0	0	0	NO	NO
ATAD1	ATAD1	4	1	1	0	0	YES	YES
ATAD2	ATAD2	4	0	0	0	0	NO	NO
ATAD2B	ATAD2B	4	0	0	0	0	NO	NO
ATAD3A	ATAD3A	3	0	0	0	0	NO	NO
ATAD3B	ATAD3B	4	0	0	1	0	YES	NO
ATAD3C	ATAD3C	4	0	0	0	0	NO	NO
ATAD5	ATAD5	4	0	0	0	0	NO	NO
ATAT1	ATAT1	4	0	0	0	0	NO	NO
ATCAY	ATCAY	4	0	0	0	0	NO	NO
ATE1	ATE1	4	0	0	0	0	NO	NO
ATF1	ATF1	4	0	0	0	0	NO	NO
ATF2	ATF2	4	0	0	0	0	NO	NO
ATF3	ATF3	4	0	0	0	0	NO	NO
ATF4	ATF4	4	1	1	3	3	YES	YES
ATF5	ATF5	4	0	0	0	0	NO	NO
ATF6	ATF6	4	0	0	0	0	NO	NO
ATF6B	ATF6B	4	0	0	0	0	NO	NO
ATF7	ATF7	4	0	0	1	0	YES	NO
ATF7IP	ATF7IP	4	0	0	3	3	YES	YES
ATF7IP2	ATF7IP2	4	0	0	1	1	YES	YES
ATG10	ATG10	4	0	0	0	0	NO	NO
ATG12	ATG12	4	0	0	3	3	YES	YES
ATG13	ATG13	4	0	0	1	0	YES	NO
ATG14	ATG14	4	0	0	0	0	NO	NO
ATG16L1	ATG16L1	4	0	0	0	0	NO	NO
ATG16L2	ATG16L2	4	0	0	0	0	NO	NO
ATG2A	ATG2A	4	0	0	0	0	NO	NO
ATG2B	ATG2B	4	0	0	0	0	NO	NO
ATG3	ATG3	4	0	0	0	0	NO	NO
ATG4A	ATG4A	4	0	0	0	0	NO	NO
ATG4B	ATG4B	4	0	0	1	0	YES	NO
ATG4C	ATG4C	4	0	0	0	0	NO	NO
ATG4D	ATG4D	4	0	0	0	0	NO	NO
ATG5	ATG5	4	0	0	0	0	NO	NO
ATG7	ATG7	4	0	0	0	0	NO	NO
ATG9A	ATG9A	4	0	0	0	0	NO	NO
ATHL1	ATHL1	4	0	0	0	0	NO	NO
ATIC	ATIC	4	0	0	0	0	NO	NO
ATL1	ATL1	4	0	0	0	0	NO	NO
ATL2	ATL2	4	0	0	0	0	NO	NO
ATL3	ATL3	4	0	0	0	0	NO	NO
ATM	ATM	4	0	0	0	0	NO	NO
ATMIN	ATMIN	4	2	2	2	2	YES	YES
ATN1	ATN1	4	0	0	0	0	NO	NO
ATOH1	ATOH1	4	0	0	0	0	NO	NO
ATOH7	ATOH7	4	0	0	1	0	YES	NO
ATOH8	ATOH8	4	0	0	0	0	NO	NO
ATOX1	ATOX1	4	0	0	0	0	NO	NO
ATP10A	ATP10A	4	0	0	0	0	NO	NO
ATP10B	ATP10B	4	0	0	0	0	NO	NO
ATP10D	ATP10D	4	0	0	0	0	NO	NO
ATP11A	ATP11A	4	0	0	0	0	NO	NO
ATP11B	ATP11B	4	0	0	0	0	NO	NO
ATP11C	ATP11C	4	0	0	0	0	NO	NO
ATP12A	ATP12A	4	0	0	0	0	NO	NO
ATP13A1	ATP13A1	4	0	0	0	0	NO	NO
ATP13A2	ATP13A2	4	0	0	0	0	NO	NO
ATP13A3	ATP13A3	4	0	0	1	0	YES	NO
ATP13A4	ATP13A4	4	0	0	0	0	NO	NO
ATP13A5	ATP13A5	4	0	0	0	0	NO	NO
ATP1A1	ATP1A1	4	0	0	0	0	NO	NO
ATP1A2	ATP1A2	4	0	0	0	0	NO	NO
ATP1A3	ATP1A3	4	0	0	0	0	NO	NO
ATP1A4	ATP1A4	4	0	0	0	0	NO	NO
ATP1B1	ATP1B1	4	0	0	1	1	YES	YES
ATP1B2	ATP1B2	4	0	0	0	0	NO	NO
ATP1B3	ATP1B3	4	1	1	3	2	YES	YES
ATP1B4	ATP1B4	4	0	0	0	0	NO	NO
ATP2A1	ATP2A1	4	0	0	0	0	NO	NO
ATP2A2	ATP2A2	4	0	0	0	0	NO	NO
ATP2A3	ATP2A3	4	0	0	0	0	NO	NO
ATP2B1	ATP2B1	4	0	0	0	0	NO	NO
ATP2B2	ATP2B2	4	0	0	0	0	NO	NO
ATP2B3	ATP2B3	4	0	0	0	0	NO	NO
ATP2B4	ATP2B4	4	0	0	0	0	NO	NO
ATP2C1	ATP2C1	4	0	0	0	0	NO	NO
ATP2C2	ATP2C2	4	0	0	0	0	NO	NO
ATP4A	ATP4A	4	0	0	0	0	NO	NO
ATP4B	ATP4B	4	0	0	0	0	NO	NO
ATP5A1	ATP5A1	4	0	0	0	0	NO	NO
ATP5B	ATP5B	4	0	0	1	0	YES	NO
ATP5C1	ATP5C1	4	1	1	0	0	YES	YES
ATP5D	ATP5D	4	0	0	0	0	NO	NO
ATP5F1	ATP5F1	4	0	0	0	0	NO	NO
ATP5G1	ATP5G1	3	0	0	0	0	NO	NO
ATP5G2	ATP5G2	4	1	1	1	1	YES	YES
ATP5G3	ATP5G3	4	0	0	0	0	NO	NO
ATP5H	ATP5H	4	0	0	2	2	YES	YES
ATP5I	ATP5I	4	0	0	0	0	NO	NO
ATP5J	ATP5J	4	1	1	0	0	YES	YES
ATP5J2	ATP5J2	1	0	0	0	0	NO	NO
ATP5L	ATP5L	3	0	0	1	1	YES	YES
ATP5L2	ATP5L2	1	0	0	0	0	NO	NO
ATP5O	ATP5O	4	0	0	1	1	YES	YES
ATP5S	ATP5S	4	0	0	0	0	NO	NO
ATP5SL	ATP5SL	4	0	0	0	0	NO	NO
ATP6AP1	ATP6AP1	4	0	0	0	0	NO	NO
ATP6AP1L	ATP6AP1L	4	0	0	0	0	NO	NO
ATP6AP2	ATP6AP2	4	1	1	0	0	YES	YES
ATP6V0A1	ATP6V0A1	4	0	0	0	0	NO	NO
ATP6V0A2	ATP6V0A2	4	0	0	0	0	NO	NO
ATP6V0A4	ATP6V0A4	4	0	0	0	0	NO	NO
ATP6V0B	ATP6V0B	4	0	0	0	0	NO	NO
ATP6V0C	ATP6V0C	4	2	2	1	1	YES	YES
ATP6V0D1	ATP6V0D1	4	0	0	0	0	NO	NO
ATP6V0D2	ATP6V0D2	4	0	0	0	0	NO	NO
ATP6V0E1	ATP6V0E1	4	0	0	0	0	NO	NO
ATP6V0E2	ATP6V0E2	4	0	0	0	0	NO	NO
ATP6V1A	ATP6V1A	4	0	0	1	0	YES	NO
ATP6V1B1	ATP6V1B1	4	0	0	0	0	NO	NO
ATP6V1B2	ATP6V1B2	4	0	0	0	0	NO	NO
ATP6V1C1	ATP6V1C1	4	0	0	0	0	NO	NO
ATP6V1C2	ATP6V1C2	4	0	0	0	0	NO	NO
ATP6V1D	ATP6V1D	4	0	0	0	0	NO	NO
ATP6V1E1	ATP6V1E1	4	1	1	3	3	YES	YES
ATP6V1E2	ATP6V1E2	4	0	0	0	0	NO	NO
ATP6V1F	ATP6V1F	4	0	0	0	0	NO	NO
ATP6V1G1	ATP6V1G1	4	0	0	1	1	YES	YES
ATP6V1G2	ATP6V1G2	4	0	0	0	0	NO	NO
ATP6V1G3	ATP6V1G3	4	0	0	0	0	NO	NO
ATP6V1H	ATP6V1H	4	0	0	0	0	NO	NO
ATP7A	ATP7A	4	0	0	0	0	NO	NO
ATP7B	ATP7B	4	0	0	0	0	NO	NO
ATP8A1	ATP8A1	4	0	0	0	0	NO	NO
ATP8A2	ATP8A2	4	0	0	0	0	NO	NO
ATP8B1	ATP8B1	4	0	0	0	0	NO	NO
ATP8B2	ATP8B2	4	0	0	0	0	NO	NO
ATP8B3	ATP8B3	4	0	0	0	0	NO	NO
ATP8B4	ATP8B4	4	0	0	0	0	NO	NO
ATP9A	ATP9A	4	0	0	0	0	NO	NO
ATP9B	ATP9B	4	0	0	0	0	NO	NO
ATPAF1	ATPAF1	4	0	0	0	0	NO	NO
ATPAF2	ATPAF2	4	0	0	0	0	NO	NO
ATPIF1	ATPIF1	4	0	0	0	0	NO	NO
ATR	ATR	4	0	0	0	0	NO	NO
ATRAID	ATRAID	4	0	0	0	0	NO	NO
ATRIP	ATRIP	4	0	0	0	0	NO	NO
ATRN	ATRN	4	0	0	0	0	NO	NO
ATRNL1	ATRNL1	4	0	0	0	0	NO	NO
ATRX	ATRX	4	0	0	0	0	NO	NO
ATXN1	ATXN1	4	0	0	1	0	YES	NO
ATXN10	ATXN10	4	0	0	0	0	NO	NO
ATXN1L	ATXN1L	4	0	0	1	0	YES	NO
ATXN2	ATXN2	4	0	0	0	0	NO	NO
ATXN2L	ATXN2L	4	0	0	0	0	NO	NO
ATXN3	ATXN3	4	0	0	1	1	YES	YES
ATXN3L	ATXN3L	4	0	0	0	0	NO	NO
ATXN7	ATXN7	4	0	0	0	0	NO	NO
ATXN7L1	ATXN7L1	4	0	0	0	0	NO	NO
ATXN7L2	ATXN7L2	4	0	0	0	0	NO	NO
ATXN7L3	ATXN7L3	4	0	0	0	0	NO	NO
ATXN7L3B	ATXN7L3B	4	0	0	0	0	NO	NO
AUH	AUH	4	0	0	0	0	NO	NO
AUNIP	AUNIP	4	0	0	0	0	NO	NO
AUP1	AUP1	4	0	0	0	0	NO	NO
AURKA	AURKA	4	0	0	0	0	NO	NO
AURKAIP1	AURKAIP1	4	0	0	0	0	NO	NO
AURKB	AURKB	4	0	0	0	0	NO	NO
AURKC	AURKC	4	0	0	0	0	NO	NO
AUTS2	AUTS2	4	0	0	0	0	NO	NO
AVEN	AVEN	4	0	0	1	0	YES	NO
AVIL	AVIL	4	0	0	0	0	NO	NO
AVL9	AVL9	4	0	0	0	0	NO	NO
AVP	AVP	4	0	0	0	0	NO	NO
AVPI1	AVPI1	4	0	0	0	0	NO	NO
AVPR1A	AVPR1A	4	0	0	0	0	NO	NO
AVPR1B	AVPR1B	4	0	0	0	0	NO	NO
AVPR2	AVPR2	4	0	0	0	0	NO	NO
AWAT1	AWAT1	4	0	0	0	0	NO	NO
AWAT2	AWAT2	4	0	0	0	0	NO	NO
AXDND1	AXDND1	4	0	0	0	0	NO	NO
AXIN1	AXIN1	4	0	0	0	0	NO	NO
AXIN2	AXIN2	4	0	0	0	0	NO	NO
AXL	AXL	4	0	0	0	0	NO	NO
AZGP1	AZGP1	4	2	2	0	0	YES	YES
AZI1	AZI1	4	0	0	0	0	NO	NO
AZI2	AZI2	4	0	0	0	0	NO	NO
AZIN1	AZIN1	4	0	0	1	0	YES	NO
AZU1	AZU1	4	0	0	0	0	NO	NO
B2M	B2M	4	0	0	0	0	NO	NO
B3GALNT1	B3GALNT1	4	0	0	1	1	YES	YES
B3GALNT2	B3GALNT2	4	0	0	0	0	NO	NO
B3GALT1	B3GALT1	4	0	0	0	0	NO	NO
B3GALT2	B3GALT2	4	0	0	0	0	NO	NO
B3GALT4	B3GALT4	4	0	0	0	0	NO	NO
B3GALT5	B3GALT5	4	0	0	0	0	NO	NO
B3GALT6	B3GALT6	4	0	0	0	0	NO	NO
B3GALTL	B3GALTL	4	0	0	0	0	NO	NO
B3GAT1	B3GAT1	4	0	0	0	0	NO	NO
B3GAT2	B3GAT2	4	0	0	0	0	NO	NO
B3GAT3	B3GAT3	4	2	2	1	1	YES	YES
B3GNT1	B3GNT1	4	0	0	0	0	NO	NO
B3GNT2	B3GNT2	4	0	0	0	0	NO	NO
B3GNT3	B3GNT3	4	0	0	0	0	NO	NO
B3GNT4	B3GNT4	4	0	0	1	0	YES	NO
B3GNT5	B3GNT5	4	0	0	0	0	NO	NO
B3GNT6	B3GNT6	4	0	0	0	0	NO	NO
B3GNT7	B3GNT7	4	0	0	0	0	NO	NO
B3GNT8	B3GNT8	4	0	0	0	0	NO	NO
B3GNT9	B3GNT9	4	0	0	0	0	NO	NO
B3GNTL1	B3GNTL1	4	0	0	0	0	NO	NO
B4GALNT1	B4GALNT1	4	0	0	0	0	NO	NO
B4GALNT2	B4GALNT2	4	0	0	0	0	NO	NO
B4GALNT3	B4GALNT3	4	0	0	0	0	NO	NO
B4GALNT4	B4GALNT4	4	0	0	0	0	NO	NO
B4GALT1	B4GALT1	4	0	0	1	0	YES	NO
B4GALT2	B4GALT2	4	0	0	0	0	NO	NO
B4GALT3	B4GALT3	4	0	0	0	0	NO	NO
B4GALT4	B4GALT4	4	0	0	0	0	NO	NO
B4GALT5	B4GALT5	4	0	0	0	0	NO	NO
B4GALT6	B4GALT6	4	0	0	0	0	NO	NO
B4GALT7	B4GALT7	4	0	0	0	0	NO	NO
B9D1	B9D1	4	0	0	0	0	NO	NO
B9D2	B9D2	4	0	0	0	0	NO	NO
BAALC	BAALC	4	0	0	0	0	NO	NO
BAAT	BAAT	4	0	0	0	0	NO	NO
BABAM1	BABAM1	4	0	0	0	0	NO	NO
BACE1	BACE1	4	0	0	0	0	NO	NO
BACE2	BACE2	4	0	0	0	0	NO	NO
BACH1	BACH1	4	0	0	0	0	NO	NO
BACH2	BACH2	4	0	0	0	0	NO	NO
BAD	BAD	4	0	0	0	0	NO	NO
BAG1	BAG1	4	0	0	2	2	YES	YES
BAG2	BAG2	4	0	0	0	0	NO	NO
BAG3	BAG3	4	0	0	0	0	NO	NO
BAG4	BAG4	4	1	1	0	0	YES	YES
BAG5	BAG5	4	0	0	0	0	NO	NO
BAG6	BAG6	4	0	0	0	0	NO	NO
BAHD1	BAHD1	4	0	0	0	0	NO	NO
BAI1	BAI1	4	0	0	0	0	NO	NO
BAI2	BAI2	4	0	0	0	0	NO	NO
BAI3	BAI3	4	0	0	0	0	NO	NO
BAIAP2	BAIAP2	4	0	0	0	0	NO	NO
BAIAP2L1	BAIAP2L1	4	0	0	0	0	NO	NO
BAIAP2L2	BAIAP2L2	4	0	0	0	0	NO	NO
BAIAP3	BAIAP3	4	0	0	0	0	NO	NO
BAK1	BAK1	4	4	4	1	1	YES	YES
BAMBI	BAMBI	4	0	0	0	0	NO	NO
BANF1	BANF1	4	1	1	2	2	YES	YES
BANF2	BANF2	4	0	0	0	0	NO	NO
BANK1	BANK1	4	0	0	0	0	NO	NO
BANP	BANP	4	2	2	1	1	YES	YES
BAP1	BAP1	4	0	0	0	0	NO	NO
BARD1	BARD1	4	0	0	0	0	NO	NO
BARHL1	BARHL1	4	0	0	0	0	NO	NO
BARHL2	BARHL2	4	0	0	0	0	NO	NO
BARX1	BARX1	4	0	0	0	0	NO	NO
BARX2	BARX2	4	0	0	0	0	NO	NO
BASP1	BASP1	4	0	0	1	1	YES	YES
BATF	BATF	4	0	0	0	0	NO	NO
BATF2	BATF2	4	0	0	1	0	YES	NO
BATF3	BATF3	4	0	0	0	0	NO	NO
BAX	BAX	4	0	0	0	0	NO	NO
BAZ1A	BAZ1A	4	0	0	0	0	NO	NO
BAZ1B	BAZ1B	4	0	0	0	0	NO	NO
BAZ2A	BAZ2A	4	0	0	0	0	NO	NO
BAZ2B	BAZ2B	4	0	0	1	0	YES	NO
BBC3	BBC3	4	0	0	0	0	NO	NO
BBIP1	BBIP1	4	0	0	2	0	YES	NO
BBOX1	BBOX1	4	0	0	1	0	YES	NO
BBS1	BBS1	4	0	0	0	0	NO	NO
BBS10	BBS10	4	0	0	0	0	NO	NO
BBS12	BBS12	4	0	0	0	0	NO	NO
BBS2	BBS2	4	0	0	0	0	NO	NO
BBS4	BBS4	4	0	0	0	0	NO	NO
BBS5	BBS5	4	0	0	0	0	NO	NO
BBS7	BBS7	4	0	0	0	0	NO	NO
BBS9	BBS9	4	0	0	0	0	NO	NO
BBX	BBX	4	0	0	0	0	NO	NO
BCAM	BCAM	4	0	0	0	0	NO	NO
BCAN	BCAN	4	0	0	0	0	NO	NO
BCAP29	BCAP29	4	0	0	0	0	NO	NO
BCAP31	BCAP31	4	0	0	0	0	NO	NO
BCAR1	BCAR1	4	0	0	1	1	YES	YES
BCAR3	BCAR3	4	0	0	0	0	NO	NO
BCAS1	BCAS1	4	0	0	0	0	NO	NO
BCAS2	BCAS2	4	1	1	1	1	YES	YES
BCAS3	BCAS3	4	0	0	0	0	NO	NO
BCAS4	BCAS4	4	0	0	0	0	NO	NO
BCAT1	BCAT1	4	0	0	0	0	NO	NO
BCAT2	BCAT2	4	0	0	0	0	NO	NO
BCCIP	BCCIP	4	0	0	0	0	NO	NO
BCDIN3D	BCDIN3D	4	0	0	0	0	NO	NO
BCHE	BCHE	4	0	0	0	0	NO	NO
BCKDHA	BCKDHA	4	0	0	0	0	NO	NO
BCKDHB	BCKDHB	4	0	0	0	0	NO	NO
BCKDK	BCKDK	4	0	0	0	0	NO	NO
BCL10	BCL10	4	0	0	0	0	NO	NO
BCL11A	BCL11A	4	0	0	0	0	NO	NO
BCL11B	BCL11B	4	0	0	0	0	NO	NO
BCL2	BCL2	4	0	0	0	0	NO	NO
BCL2A1	BCL2A1	3	0	0	0	0	NO	NO
BCL2L1	BCL2L1	4	0	0	0	0	NO	NO
BCL2L10	BCL2L10	4	0	0	0	0	NO	NO
BCL2L11	BCL2L11	4	0	0	1	0	YES	NO
BCL2L12	BCL2L12	4	2	2	0	0	YES	YES
BCL2L13	BCL2L13	4	0	0	0	0	NO	NO
BCL2L14	BCL2L14	4	0	0	0	0	NO	NO
BCL2L15	BCL2L15	4	0	0	0	0	NO	NO
BCL2L2	BCL2L2	3	0	0	0	0	NO	NO
BCL3	BCL3	4	0	0	0	0	NO	NO
BCL6	BCL6	4	0	0	1	0	YES	NO
BCL6B	BCL6B	4	0	0	0	0	NO	NO
BCL7A	BCL7A	4	0	0	0	0	NO	NO
BCL7B	BCL7B	4	0	0	0	0	NO	NO
BCL7C	BCL7C	4	0	0	0	0	NO	NO
BCL9	BCL9	4	0	0	0	0	NO	NO
BCL9L	BCL9L	4	0	0	0	0	NO	NO
BCLAF1	BCLAF1	4	2	2	2	2	YES	YES
BCMO1	BCMO1	4	0	0	0	0	NO	NO
BCO2	BCO2	4	0	0	0	0	NO	NO
BCOR	BCOR	4	0	0	0	0	NO	NO
BCORL1	BCORL1	4	0	0	0	0	NO	NO
BCR	BCR	4	0	0	0	0	NO	NO
BCS1L	BCS1L	4	0	0	0	0	NO	NO
BDH1	BDH1	4	0	0	0	0	NO	NO
BDH2	BDH2	4	2	2	0	0	YES	YES
BDKRB1	BDKRB1	4	0	0	0	0	NO	NO
BDKRB2	BDKRB2	4	0	0	0	0	NO	NO
BDNF	BDNF	4	0	0	0	0	NO	NO
BDP1	BDP1	4	0	0	3	3	YES	YES
BEAN1	BEAN1	4	0	0	0	0	NO	NO
BECN1	BECN1	4	0	0	0	0	NO	NO
BEGAIN	BEGAIN	4	0	0	0	0	NO	NO
BEND2	BEND2	4	0	0	0	0	NO	NO
BEND3	BEND3	4	0	0	0	0	NO	NO
BEND4	BEND4	4	0	0	0	0	NO	NO
BEND5	BEND5	4	0	0	0	0	NO	NO
BEND6	BEND6	4	0	0	0	0	NO	NO
BEND7	BEND7	4	0	0	0	0	NO	NO
BEST1	BEST1	4	0	0	0	0	NO	NO
BEST2	BEST2	4	0	0	0	0	NO	NO
BEST3	BEST3	4	0	0	0	0	NO	NO
BEST4	BEST4	4	0	0	0	0	NO	NO
BET1	BET1	3	0	0	0	0	NO	NO
BET1L	BET1L	4	0	0	0	0	NO	NO
BEX1	BEX1	4	0	0	0	0	NO	NO
BEX2	BEX2	2	0	0	0	0	NO	NO
BEX4	BEX4	4	0	0	0	0	NO	NO
BEX5	BEX5	4	0	0	1	1	YES	YES
BFAR	BFAR	4	0	0	0	0	NO	NO
BFSP1	BFSP1	4	0	0	0	0	NO	NO
BFSP2	BFSP2	4	0	0	0	0	NO	NO
BGLAP	BGLAP	4	0	0	0	0	NO	NO
BGN	BGN	4	0	0	0	0	NO	NO
BHLHA15	BHLHA15	4	0	0	1	0	YES	NO
BHLHA9	BHLHA9	4	0	0	0	0	NO	NO
BHLHB9	BHLHB9	4	0	0	2	2	YES	YES
BHLHE22	BHLHE22	4	0	0	0	0	NO	NO
BHLHE23	BHLHE23	4	0	0	0	0	NO	NO
BHLHE40	BHLHE40	4	0	0	0	0	NO	NO
BHLHE41	BHLHE41	4	0	0	0	0	NO	NO
BHMT	BHMT	4	0	0	0	0	NO	NO
BHMT2	BHMT2	4	0	0	0	0	NO	NO
BICC1	BICC1	4	0	0	0	0	NO	NO
BICD1	BICD1	4	0	0	0	0	NO	NO
BICD2	BICD2	4	0	0	0	0	NO	NO
BID	BID	4	0	0	0	0	NO	NO
BIK	BIK	4	0	0	1	1	YES	YES
BIN1	BIN1	4	0	0	0	0	NO	NO
BIN2	BIN2	4	1	1	3	3	YES	YES
BIN3	BIN3	4	0	0	0	0	NO	NO
BIRC2	BIRC2	4	0	0	0	0	NO	NO
BIRC3	BIRC3	4	0	0	0	0	NO	NO
BIRC5	BIRC5	4	0	0	0	0	NO	NO
BIRC6	BIRC6	4	0	0	0	0	NO	NO
BIRC7	BIRC7	4	0	0	0	0	NO	NO
BIRC8	BIRC8	4	0	0	0	0	NO	NO
BIVM	BIVM	4	0	0	0	0	NO	NO
BLACE	BLACE	4	0	0	0	0	NO	NO
BLCAP	BLCAP	4	0	0	2	0	YES	NO
BLID	BLID	4	0	0	0	0	NO	NO
BLK	BLK	4	0	0	0	0	NO	NO
BLM	BLM	4	0	0	0	0	NO	NO
BLMH	BLMH	4	0	0	0	0	NO	NO
BLNK	BLNK	4	0	0	0	0	NO	NO
BLOC1S1	BLOC1S1	4	0	0	0	0	NO	NO
BLOC1S2	BLOC1S2	4	0	0	1	1	YES	YES
BLOC1S3	BLOC1S3	4	0	0	0	0	NO	NO
BLOC1S4	BLOC1S4	4	0	0	0	0	NO	NO
BLOC1S5	BLOC1S5	4	0	0	0	0	NO	NO
BLOC1S6	BLOC1S6	4	0	0	1	0	YES	NO
BLVRA	BLVRA	4	0	0	0	0	NO	NO
BLVRB	BLVRB	4	0	0	0	0	NO	NO
BLZF1	BLZF1	4	0	0	1	1	YES	YES
BMF	BMF	4	0	0	0	0	NO	NO
BMI1	BMI1	4	0	0	0	0	NO	NO
BMP1	BMP1	4	0	0	0	0	NO	NO
BMP10	BMP10	4	0	0	1	1	YES	YES
BMP15	BMP15	4	0	0	0	0	NO	NO
BMP2	BMP2	4	0	0	0	0	NO	NO
BMP2K	BMP2K	4	0	0	0	0	NO	NO
BMP3	BMP3	4	0	0	0	0	NO	NO
BMP4	BMP4	4	0	0	0	0	NO	NO
BMP5	BMP5	4	0	0	0	0	NO	NO
BMP6	BMP6	4	0	0	0	0	NO	NO
BMP7	BMP7	4	0	0	0	0	NO	NO
BMP8A	BMP8A	3	0	0	0	0	NO	NO
BMP8B	BMP8B	1	0	0	0	0	NO	NO
BMPER	BMPER	4	0	0	0	0	NO	NO
BMPR1A	BMPR1A	4	2	2	0	0	YES	YES
BMPR1B	BMPR1B	4	0	0	0	0	NO	NO
BMPR2	BMPR2	4	0	0	0	0	NO	NO
BMS1	BMS1	4	0	0	0	0	NO	NO
BMX	BMX	4	0	0	2	2	YES	YES
BNC1	BNC1	4	0	0	0	0	NO	NO
BNC2	BNC2	4	0	0	0	0	NO	NO
BNIP1	BNIP1	4	0	0	0	0	NO	NO
BNIP2	BNIP2	4	0	0	0	0	NO	NO
BNIP3	BNIP3	4	1	1	0	0	YES	YES
BNIP3L	BNIP3L	4	0	0	0	0	NO	NO
BNIPL	BNIPL	4	0	0	0	0	NO	NO
BOC	BOC	4	0	0	1	0	YES	NO
BOD1	BOD1	1	0	0	0	0	NO	NO
BOD1L1	BOD1L1	4	0	0	0	0	NO	NO
BOD1L2	BOD1L2	4	0	0	0	0	NO	NO
BOK	BOK	4	0	0	0	0	NO	NO
BOLA1	BOLA1	4	0	0	0	0	NO	NO
BOLA3	BOLA3	4	1	1	2	2	YES	YES
BOLL	BOLL	4	0	0	0	0	NO	NO
BOP1	BOP1	4	0	0	0	0	NO	NO
BORA	BORA	4	0	0	0	0	NO	NO
BPGM	BPGM	4	0	0	0	0	NO	NO
BPHL	BPHL	4	0	0	0	0	NO	NO
BPI	BPI	4	0	0	0	0	NO	NO
BPIFA1	BPIFA1	4	0	0	1	0	YES	NO
BPIFA2	BPIFA2	4	0	0	0	0	NO	NO
BPIFA3	BPIFA3	4	0	0	0	0	NO	NO
BPIFB1	BPIFB1	4	0	0	1	0	YES	NO
BPIFB2	BPIFB2	4	0	0	0	0	NO	NO
BPIFB3	BPIFB3	4	0	0	0	0	NO	NO
BPIFB4	BPIFB4	4	0	0	0	0	NO	NO
BPIFB6	BPIFB6	4	0	0	0	0	NO	NO
BPIFC	BPIFC	4	0	0	0	0	NO	NO
BPNT1	BPNT1	4	0	0	0	0	NO	NO
BPTF	BPTF	4	0	0	0	0	NO	NO
BRAF	BRAF	4	0	0	0	0	NO	NO
BRAP	BRAP	4	0	0	0	0	NO	NO
BRAT1	BRAT1	4	0	0	0	0	NO	NO
BRCA1	BRCA1	4	0	0	1	0	YES	NO
BRCA2	BRCA2	4	0	0	0	0	NO	NO
BRCC3	BRCC3	4	3	3	1	1	YES	YES
BRD1	BRD1	4	0	0	0	0	NO	NO
BRD2	BRD2	4	0	0	0	0	NO	NO
BRD3	BRD3	4	0	0	0	0	NO	NO
BRD4	BRD4	4	0	0	0	0	NO	NO
BRD7	BRD7	4	1	1	3	3	YES	YES
BRD8	BRD8	4	0	0	0	0	NO	NO
BRD9	BRD9	4	0	0	0	0	NO	NO
BRDT	BRDT	4	0	0	0	0	NO	NO
BRE	BRE	4	0	0	0	0	NO	NO
BRF1	BRF1	4	0	0	0	0	NO	NO
BRF2	BRF2	4	0	0	0	0	NO	NO
BRI3	BRI3	4	2	2	1	1	YES	YES
BRI3BP	BRI3BP	4	0	0	0	0	NO	NO
BRICD5	BRICD5	4	0	0	0	0	NO	NO
BRINP1	BRINP1	4	0	0	0	0	NO	NO
BRINP2	BRINP2	4	0	0	0	0	NO	NO
BRINP3	BRINP3	4	0	0	0	0	NO	NO
BRIP1	BRIP1	4	0	0	0	0	NO	NO
BRIX1	BRIX1	4	0	0	1	1	YES	YES
BRK1	BRK1	4	0	0	0	0	NO	NO
BRMS1	BRMS1	4	0	0	0	0	NO	NO
BRMS1L	BRMS1L	4	0	0	0	0	NO	NO
BROX	BROX	4	0	0	0	0	NO	NO
BRPF1	BRPF1	4	0	0	0	0	NO	NO
BRPF3	BRPF3	4	0	0	0	0	NO	NO
BRS3	BRS3	4	0	0	1	0	YES	NO
BRSK1	BRSK1	4	0	0	0	0	NO	NO
BRSK2	BRSK2	4	0	0	0	0	NO	NO
BRWD1	BRWD1	4	0	0	0	0	NO	NO
BRWD3	BRWD3	4	0	0	0	0	NO	NO
BSCL2	BSCL2	4	0	0	0	0	NO	NO
BSDC1	BSDC1	4	0	0	0	0	NO	NO
BSG	BSG	4	0	0	0	0	NO	NO
BSN	BSN	4	0	0	0	0	NO	NO
BSND	BSND	4	0	0	0	0	NO	NO
BSPH1	BSPH1	4	0	0	0	0	NO	NO
BSPRY	BSPRY	4	0	0	0	0	NO	NO
BST1	BST1	4	0	0	0	0	NO	NO
BST2	BST2	4	0	0	0	0	NO	NO
BSX	BSX	4	0	0	0	0	NO	NO
BTAF1	BTAF1	4	0	0	1	0	YES	NO
BTBD1	BTBD1	4	0	0	0	0	NO	NO
BTBD10	BTBD10	4	0	0	3	3	YES	YES
BTBD11	BTBD11	4	0	0	0	0	NO	NO
BTBD16	BTBD16	4	0	0	0	0	NO	NO
BTBD17	BTBD17	4	0	0	0	0	NO	NO
BTBD18	BTBD18	4	0	0	0	0	NO	NO
BTBD19	BTBD19	4	0	0	0	0	NO	NO
BTBD2	BTBD2	4	0	0	0	0	NO	NO
BTBD3	BTBD3	4	0	0	0	0	NO	NO
BTBD6	BTBD6	4	1	1	1	1	YES	YES
BTBD7	BTBD7	4	0	0	1	0	YES	NO
BTBD8	BTBD8	4	0	0	0	0	NO	NO
BTBD9	BTBD9	4	0	0	0	0	NO	NO
BTC	BTC	4	0	0	0	0	NO	NO
BTD	BTD	4	0	0	0	0	NO	NO
BTF3	BTF3	2	0	0	0	0	NO	NO
BTF3L4	BTF3L4	4	1	1	0	0	YES	YES
BTG1	BTG1	4	0	0	0	0	NO	NO
BTG2	BTG2	4	0	0	0	0	NO	NO
BTG3	BTG3	4	0	0	0	0	NO	NO
BTG4	BTG4	4	0	0	0	0	NO	NO
BTK	BTK	4	0	0	0	0	NO	NO
BTLA	BTLA	4	0	0	0	0	NO	NO
BTN1A1	BTN1A1	4	0	0	0	0	NO	NO
BTN2A1	BTN2A1	4	0	0	0	0	NO	NO
BTN2A2	BTN2A2	4	0	0	0	0	NO	NO
BTN3A1	BTN3A1	4	0	0	0	0	NO	NO
BTN3A2	BTN3A2	2	0	0	0	0	NO	NO
BTN3A3	BTN3A3	4	0	0	0	0	NO	NO
BTNL3	BTNL3	4	0	0	0	0	NO	NO
BTNL8	BTNL8	4	0	0	0	0	NO	NO
BTNL9	BTNL9	4	0	0	0	0	NO	NO
BTRC	BTRC	4	0	0	0	0	NO	NO
BUB1	BUB1	4	0	0	0	0	NO	NO
BUB1B	BUB1B	4	0	0	0	0	NO	NO
BUB3	BUB3	4	0	0	2	2	YES	YES
BUD13	BUD13	4	0	0	0	0	NO	NO
BUD31	BUD31	4	0	0	0	0	NO	NO
BVES	BVES	4	0	0	0	0	NO	NO
BYSL	BYSL	4	0	0	0	0	NO	NO
BZRAP1	BZRAP1	4	0	0	0	0	NO	NO
BZW1	BZW1	4	2	2	1	1	YES	YES
BZW2	BZW2	4	0	0	0	0	NO	NO
C10orf10	C10orf10	4	0	0	0	0	NO	NO
C10orf105	C10orf105	4	0	0	0	0	NO	NO
C10orf107	C10orf107	4	0	0	0	0	NO	NO
C10orf11	C10orf11	4	0	0	0	0	NO	NO
C10orf111	C10orf111	4	0	0	0	0	NO	NO
C10orf113	C10orf113	4	0	0	0	0	NO	NO
C10orf115	C10orf115	4	0	0	0	0	NO	NO
C10orf118	C10orf118	4	0	0	0	0	NO	NO
C10orf12	C10orf12	4	0	0	0	0	NO	NO
C10orf120	C10orf120	4	0	0	0	0	NO	NO
C10orf126	C10orf126	4	0	0	0	0	NO	NO
C10orf128	C10orf128	4	0	0	1	0	YES	NO
C10orf129	C10orf129	4	0	0	0	0	NO	NO
C10orf131	C10orf131	4	0	0	1	0	YES	NO
C10orf137	C10orf137	4	0	0	0	0	NO	NO
C10orf2	C10orf2	4	0	0	0	0	NO	NO
C10orf25	C10orf25	3	0	0	0	0	NO	NO
C10orf32	C10orf32	4	0	0	0	0	NO	NO
C10orf35	C10orf35	4	0	0	0	0	NO	NO
C10orf40	C10orf40	4	0	0	0	0	NO	NO
C10orf53	C10orf53	4	0	0	0	0	NO	NO
C10orf54	C10orf54	4	0	0	0	0	NO	NO
C10orf55	C10orf55	4	0	0	0	0	NO	NO
C10orf62	C10orf62	4	0	0	0	0	NO	NO
C10orf67	C10orf67	4	0	0	0	0	NO	NO
C10orf68	C10orf68	4	1	0	0	0	YES	NO
C10orf71	C10orf71	4	0	0	1	1	YES	YES
C10orf76	C10orf76	4	0	0	0	0	NO	NO
C10orf82	C10orf82	4	0	0	0	0	NO	NO
C10orf85	C10orf85	4	0	0	0	0	NO	NO
C10orf88	C10orf88	4	1	1	1	1	YES	YES
C10orf90	C10orf90	4	0	0	0	0	NO	NO
C10orf91	C10orf91	4	0	0	0	0	NO	NO
C10orf95	C10orf95	4	0	0	0	0	NO	NO
C10orf99	C10orf99	4	0	0	0	0	NO	NO
C11orf1	C11orf1	4	0	0	0	0	NO	NO
C11orf16	C11orf16	4	0	0	0	0	NO	NO
C11orf21	C11orf21	4	0	0	0	0	NO	NO
C11orf24	C11orf24	4	0	0	3	3	YES	YES
C11orf30	C11orf30	4	0	0	0	0	NO	NO
C11orf31	C11orf31	4	0	0	0	0	NO	NO
C11orf35	C11orf35	4	0	0	0	0	NO	NO
C11orf40	C11orf40	4	0	0	0	0	NO	NO
C11orf42	C11orf42	4	0	0	0	0	NO	NO
C11orf44	C11orf44	4	0	0	0	0	NO	NO
C11orf45	C11orf45	4	0	0	0	0	NO	NO
C11orf48	C11orf48	4	0	0	0	0	NO	NO
C11orf49	C11orf49	4	0	0	0	0	NO	NO
C11orf52	C11orf52	4	0	0	0	0	NO	NO
C11orf53	C11orf53	4	0	0	0	0	NO	NO
C11orf54	C11orf54	4	0	0	0	0	NO	NO
C11orf57	C11orf57	4	0	0	0	0	NO	NO
C11orf58	C11orf58	4	1	1	2	2	YES	YES
C11orf63	C11orf63	4	0	0	0	0	NO	NO
C11orf65	C11orf65	4	0	0	1	0	YES	NO
C11orf68	C11orf68	4	0	0	0	0	NO	NO
C11orf70	C11orf70	4	0	0	0	0	NO	NO
C11orf71	C11orf71	4	0	0	0	0	NO	NO
C11orf72	C11orf72	4	0	0	0	0	NO	NO
C11orf73	C11orf73	4	4	4	1	1	YES	YES
C11orf74	C11orf74	2	1	1	0	0	YES	YES
C11orf80	C11orf80	4	0	0	0	0	NO	NO
C11orf82	C11orf82	4	0	0	0	0	NO	NO
C11orf83	C11orf83	4	0	0	0	0	NO	NO
C11orf84	C11orf84	4	0	0	0	0	NO	NO
C11orf85	C11orf85	4	0	0	0	0	NO	NO
C11orf86	C11orf86	4	0	0	0	0	NO	NO
C11orf87	C11orf87	4	0	0	0	0	NO	NO
C11orf88	C11orf88	4	0	0	0	0	NO	NO
C11orf89	C11orf89	4	0	0	0	0	NO	NO
C11orf91	C11orf91	4	0	0	0	0	NO	NO
C11orf94	C11orf94	4	0	0	0	0	NO	NO
C11orf96	C11orf96	4	0	0	0	0	NO	NO
C12orf10	C12orf10	4	0	0	0	0	NO	NO
C12orf23	C12orf23	4	0	0	0	0	NO	NO
C12orf29	C12orf29	4	0	0	1	1	YES	YES
C12orf36	C12orf36	4	0	0	1	0	YES	NO
C12orf39	C12orf39	4	0	0	0	0	NO	NO
C12orf4	C12orf4	4	0	0	0	0	NO	NO
C12orf40	C12orf40	4	0	0	0	0	NO	NO
C12orf42	C12orf42	4	0	0	0	0	NO	NO
C12orf43	C12orf43	2	0	0	0	0	NO	NO
C12orf44	C12orf44	4	0	0	0	0	NO	NO
C12orf45	C12orf45	4	0	0	0	0	NO	NO
C12orf49	C12orf49	4	1	1	1	1	YES	YES
C12orf5	C12orf5	4	0	0	0	0	NO	NO
C12orf50	C12orf50	4	0	0	0	0	NO	NO
C12orf52	C12orf52	4	0	0	0	0	NO	NO
C12orf54	C12orf54	4	0	0	0	0	NO	NO
C12orf55	C12orf55	4	0	0	0	0	NO	NO
C12orf56	C12orf56	4	0	0	0	0	NO	NO
C12orf57	C12orf57	4	0	0	0	0	NO	NO
C12orf60	C12orf60	4	0	0	0	0	NO	NO
C12orf61	C12orf61	4	0	0	0	0	NO	NO
C12orf65	C12orf65	4	0	0	0	0	NO	NO
C12orf66	C12orf66	4	0	0	0	0	NO	NO
C12orf68	C12orf68	4	0	0	0	0	NO	NO
C12orf71	C12orf71	4	3	3	0	0	YES	YES
C12orf73	C12orf73	4	0	0	0	0	NO	NO
C12orf74	C12orf74	4	0	0	0	0	NO	NO
C12orf75	C12orf75	4	0	0	0	0	NO	NO
C12orf76	C12orf76	4	0	0	0	0	NO	NO
C12orf77	C12orf77	4	0	0	0	0	NO	NO
C13orf35	C13orf35	4	0	0	0	0	NO	NO
C14orf1	C14orf1	4	0	0	0	0	NO	NO
C14orf105	C14orf105	4	0	0	0	0	NO	NO
C14orf119	C14orf119	4	0	0	0	0	NO	NO
C14orf132	C14orf132	4	0	0	0	0	NO	NO
C14orf142	C14orf142	4	0	0	0	0	NO	NO
C14orf159	C14orf159	4	0	0	0	0	NO	NO
C14orf164	C14orf164	4	0	0	0	0	NO	NO
C14orf166	C14orf166	4	0	0	1	1	YES	YES
C14orf166B	C14orf166B	4	0	0	0	0	NO	NO
C14orf177	C14orf177	4	0	0	0	0	NO	NO
C14orf178	C14orf178	4	0	0	0	0	NO	NO
C14orf180	C14orf180	4	0	0	0	0	NO	NO
C14orf182	C14orf182	4	0	0	0	0	NO	NO
C14orf183	C14orf183	4	0	0	0	0	NO	NO
C14orf2	C14orf2	2	0	0	0	0	NO	NO
C14orf23	C14orf23	4	0	0	0	0	NO	NO
C14orf28	C14orf28	4	0	0	0	0	NO	NO
C14orf37	C14orf37	4	0	0	0	0	NO	NO
C14orf39	C14orf39	4	0	0	0	0	NO	NO
C14orf79	C14orf79	4	0	0	0	0	NO	NO
C14orf80	C14orf80	4	0	0	0	0	NO	NO
C14orf93	C14orf93	4	0	0	0	0	NO	NO
C15orf26	C15orf26	4	0	0	1	0	YES	NO
C15orf27	C15orf27	4	0	0	0	0	NO	NO
C15orf32	C15orf32	4	0	0	0	0	NO	NO
C15orf37	C15orf37	4	0	0	1	0	YES	NO
C15orf38	C15orf38	2	0	0	0	0	NO	NO
C15orf39	C15orf39	4	0	0	0	0	NO	NO
C15orf40	C15orf40	4	2	2	0	0	YES	YES
C15orf41	C15orf41	4	0	0	0	0	NO	NO
C15orf43	C15orf43	4	0	0	0	0	NO	NO
C15orf48	C15orf48	4	0	0	0	0	NO	NO
C15orf52	C15orf52	4	0	0	0	0	NO	NO
C15orf53	C15orf53	4	0	0	0	0	NO	NO
C15orf54	C15orf54	4	0	0	0	0	NO	NO
C15orf56	C15orf56	4	0	0	0	0	NO	NO
C15orf57	C15orf57	4	0	0	0	0	NO	NO
C15orf59	C15orf59	4	0	0	0	0	NO	NO
C15orf60	C15orf60	4	0	0	0	0	NO	NO
C15orf61	C15orf61	4	0	0	0	0	NO	NO
C15orf62	C15orf62	4	0	0	0	0	NO	NO
C16orf11	C16orf11	4	0	0	0	0	NO	NO
C16orf13	C16orf13	4	0	0	0	0	NO	NO
C16orf3	C16orf3	4	0	0	0	0	NO	NO
C16orf45	C16orf45	4	0	0	0	0	NO	NO
C16orf46	C16orf46	4	0	0	0	0	NO	NO
C16orf47	C16orf47	4	0	0	0	0	NO	NO
C16orf52	C16orf52	4	0	0	0	0	NO	NO
C16orf54	C16orf54	4	0	0	0	0	NO	NO
C16orf58	C16orf58	4	0	0	1	0	YES	NO
C16orf59	C16orf59	4	0	0	0	0	NO	NO
C16orf62	C16orf62	4	0	0	1	1	YES	YES
C16orf70	C16orf70	4	0	0	1	0	YES	NO
C16orf71	C16orf71	4	0	0	0	0	NO	NO
C16orf72	C16orf72	4	0	0	0	0	NO	NO
C16orf74	C16orf74	4	0	0	0	0	NO	NO
C16orf78	C16orf78	4	0	0	0	0	NO	NO
C16orf80	C16orf80	4	0	0	0	0	NO	NO
C16orf86	C16orf86	4	0	0	0	0	NO	NO
C16orf87	C16orf87	4	0	0	0	0	NO	NO
C16orf89	C16orf89	4	0	0	0	0	NO	NO
C16orf90	C16orf90	4	0	0	0	0	NO	NO
C16orf91	C16orf91	4	0	0	0	0	NO	NO
C16orf92	C16orf92	4	0	0	0	0	NO	NO
C16orf93	C16orf93	4	0	0	1	0	YES	NO
C16orf95	C16orf95	4	0	0	0	0	NO	NO
C16orf96	C16orf96	4	0	0	0	0	NO	NO
C16orf97	C16orf97	4	0	0	0	0	NO	NO
C16orf98	C16orf98	4	0	0	0	0	NO	NO
C17orf100	C17orf100	4	0	0	0	0	NO	NO
C17orf102	C17orf102	4	0	0	0	0	NO	NO
C17orf104	C17orf104	4	0	0	0	0	NO	NO
C17orf105	C17orf105	4	0	0	0	0	NO	NO
C17orf107	C17orf107	4	0	0	0	0	NO	NO
C17orf112	C17orf112	4	0	0	0	0	NO	NO
C17orf47	C17orf47	4	0	0	0	0	NO	NO
C17orf49	C17orf49	1	0	0	0	0	NO	NO
C17orf50	C17orf50	4	0	0	0	0	NO	NO
C17orf51	C17orf51	4	0	0	1	1	YES	YES
C17orf53	C17orf53	4	0	0	0	0	NO	NO
C17orf58	C17orf58	4	0	0	3	3	YES	YES
C17orf59	C17orf59	4	0	0	0	0	NO	NO
C17orf62	C17orf62	4	0	0	0	0	NO	NO
C17orf64	C17orf64	4	0	0	0	0	NO	NO
C17orf66	C17orf66	4	0	0	0	0	NO	NO
C17orf67	C17orf67	4	0	0	0	0	NO	NO
C17orf70	C17orf70	4	0	0	0	0	NO	NO
C17orf72	C17orf72	4	0	0	0	0	NO	NO
C17orf74	C17orf74	4	0	0	1	0	YES	NO
C17orf75	C17orf75	4	0	0	0	0	NO	NO
C17orf77	C17orf77	4	0	0	0	0	NO	NO
C17orf78	C17orf78	4	0	0	0	0	NO	NO
C17orf80	C17orf80	4	0	0	0	0	NO	NO
C17orf82	C17orf82	4	0	0	0	0	NO	NO
C17orf85	C17orf85	4	0	0	0	0	NO	NO
C17orf89	C17orf89	4	1	1	1	1	YES	YES
C17orf96	C17orf96	4	0	0	0	0	NO	NO
C17orf97	C17orf97	4	0	0	1	0	YES	NO
C17orf98	C17orf98	4	0	0	0	0	NO	NO
C17orf99	C17orf99	4	0	0	0	0	NO	NO
C18orf21	C18orf21	4	0	0	0	0	NO	NO
C18orf25	C18orf25	4	1	1	1	1	YES	YES
C18orf42	C18orf42	4	0	0	0	0	NO	NO
C18orf54	C18orf54	4	0	0	0	0	NO	NO
C18orf63	C18orf63	4	0	0	0	0	NO	NO
C18orf8	C18orf8	4	0	0	0	0	NO	NO
C19orf10	C19orf10	4	0	0	0	0	NO	NO
C19orf12	C19orf12	4	0	0	0	0	NO	NO
C19orf18	C19orf18	4	0	0	0	0	NO	NO
C19orf24	C19orf24	4	0	0	0	0	NO	NO
C19orf25	C19orf25	4	0	0	0	0	NO	NO
C19orf26	C19orf26	4	0	0	0	0	NO	NO
C19orf33	C19orf33	4	0	0	0	0	NO	NO
C19orf35	C19orf35	4	0	0	0	0	NO	NO
C19orf38	C19orf38	4	0	0	0	0	NO	NO
C19orf40	C19orf40	4	0	0	0	0	NO	NO
C19orf43	C19orf43	4	0	0	0	0	NO	NO
C19orf44	C19orf44	4	0	0	0	0	NO	NO
C19orf45	C19orf45	4	0	0	0	0	NO	NO
C19orf47	C19orf47	4	0	0	0	0	NO	NO
C19orf48	C19orf48	4	0	0	1	0	YES	NO
C19orf52	C19orf52	4	0	0	0	0	NO	NO
C19orf53	C19orf53	4	0	0	1	1	YES	YES
C19orf54	C19orf54	4	0	0	0	0	NO	NO
C19orf55	C19orf55	4	0	0	0	0	NO	NO
C19orf57	C19orf57	4	0	0	1	1	YES	YES
C19orf59	C19orf59	4	0	0	0	0	NO	NO
C19orf60	C19orf60	4	0	0	1	1	YES	YES
C19orf66	C19orf66	4	0	0	0	0	NO	NO
C19orf67	C19orf67	4	0	0	0	0	NO	NO
C19orf68	C19orf68	4	0	0	0	0	NO	NO
C19orf70	C19orf70	4	0	0	0	0	NO	NO
C19orf71	C19orf71	4	0	0	0	0	NO	NO
C19orf73	C19orf73	4	0	0	0	0	NO	NO
C19orf77	C19orf77	4	0	0	1	0	YES	NO
C19orf80	C19orf80	4	0	0	0	0	NO	NO
C19orf81	C19orf81	4	0	0	0	0	NO	NO
C1D	C1D	2	1	1	0	0	YES	YES
C1GALT1	C1GALT1	4	0	0	1	1	YES	YES
C1GALT1C1	C1GALT1C1	4	0	0	0	0	NO	NO
C1orf100	C1orf100	4	0	0	0	0	NO	NO
C1orf101	C1orf101	4	0	0	0	0	NO	NO
C1orf105	C1orf105	4	0	0	0	0	NO	NO
C1orf106	C1orf106	4	0	0	0	0	NO	NO
C1orf109	C1orf109	4	0	0	0	0	NO	NO
C1orf110	C1orf110	4	0	0	0	0	NO	NO
C1orf111	C1orf111	4	0	0	0	0	NO	NO
C1orf112	C1orf112	4	0	0	0	0	NO	NO
C1orf115	C1orf115	4	0	0	0	0	NO	NO
C1orf116	C1orf116	4	0	0	0	0	NO	NO
C1orf122	C1orf122	4	0	0	0	0	NO	NO
C1orf123	C1orf123	4	0	0	0	0	NO	NO
C1orf131	C1orf131	4	0	0	0	0	NO	NO
C1orf137	C1orf137	4	0	0	0	0	NO	NO
C1orf141	C1orf141	4	0	0	0	0	NO	NO
C1orf145	C1orf145	1	0	0	0	0	NO	NO
C1orf146	C1orf146	2	0	0	0	0	NO	NO
C1orf147	C1orf147	4	0	0	0	0	NO	NO
C1orf158	C1orf158	4	0	0	0	0	NO	NO
C1orf159	C1orf159	4	0	0	0	0	NO	NO
C1orf162	C1orf162	4	0	0	0	0	NO	NO
C1orf168	C1orf168	4	0	0	0	0	NO	NO
C1orf170	C1orf170	4	0	0	0	0	NO	NO
C1orf172	C1orf172	4	0	0	0	0	NO	NO
C1orf173	C1orf173	4	0	0	1	1	YES	YES
C1orf174	C1orf174	4	0	0	0	0	NO	NO
C1orf177	C1orf177	4	0	0	0	0	NO	NO
C1orf180	C1orf180	4	0	0	1	0	YES	NO
C1orf185	C1orf185	4	0	0	0	0	NO	NO
C1orf186	C1orf186	4	0	0	0	0	NO	NO
C1orf189	C1orf189	4	0	0	0	0	NO	NO
C1orf192	C1orf192	4	0	0	0	0	NO	NO
C1orf194	C1orf194	4	0	0	0	0	NO	NO
C1orf195	C1orf195	4	0	0	0	0	NO	NO
C1orf198	C1orf198	4	0	0	1	0	YES	NO
C1orf200	C1orf200	4	0	0	0	0	NO	NO
C1orf204	C1orf204	4	0	0	0	0	NO	NO
C1orf21	C1orf21	4	0	0	0	0	NO	NO
C1orf210	C1orf210	4	0	0	0	0	NO	NO
C1orf213	C1orf213	4	0	0	0	0	NO	NO
C1orf216	C1orf216	4	0	0	0	0	NO	NO
C1orf220	C1orf220	4	0	0	1	1	YES	YES
C1orf226	C1orf226	4	0	0	1	0	YES	NO
C1orf227	C1orf227	4	0	0	0	0	NO	NO
C1orf228	C1orf228	4	0	0	0	0	NO	NO
C1orf229	C1orf229	4	0	0	0	0	NO	NO
C1orf233	C1orf233	4	0	0	0	0	NO	NO
C1orf27	C1orf27	4	0	0	0	0	NO	NO
C1orf35	C1orf35	4	0	0	0	0	NO	NO
C1orf43	C1orf43	4	0	0	0	0	NO	NO
C1orf50	C1orf50	4	0	0	0	0	NO	NO
C1orf51	C1orf51	4	0	0	0	0	NO	NO
C1orf52	C1orf52	4	0	0	0	0	NO	NO
C1orf53	C1orf53	4	0	0	0	0	NO	NO
C1orf54	C1orf54	4	0	0	0	0	NO	NO
C1orf56	C1orf56	4	0	0	0	0	NO	NO
C1orf61	C1orf61	4	0	0	0	0	NO	NO
C1orf63	C1orf63	4	0	0	0	0	NO	NO
C1orf64	C1orf64	4	0	0	0	0	NO	NO
C1orf65	C1orf65	4	0	0	0	0	NO	NO
C1orf68	C1orf68	4	0	0	1	1	YES	YES
C1orf74	C1orf74	4	0	0	0	0	NO	NO
C1orf85	C1orf85	4	0	0	0	0	NO	NO
C1orf86	C1orf86	4	0	0	0	0	NO	NO
C1orf87	C1orf87	4	0	0	0	0	NO	NO
C1orf94	C1orf94	4	0	0	0	0	NO	NO
C1orf95	C1orf95	4	0	0	0	0	NO	NO
C1QA	C1QA	4	0	0	0	0	NO	NO
C1QB	C1QB	4	0	0	0	0	NO	NO
C1QBP	C1QBP	4	1	1	2	2	YES	YES
C1QC	C1QC	4	0	0	0	0	NO	NO
C1QL1	C1QL1	4	0	0	0	0	NO	NO
C1QL2	C1QL2	4	0	0	0	0	NO	NO
C1QL3	C1QL3	4	0	0	0	0	NO	NO
C1QL4	C1QL4	4	0	0	0	0	NO	NO
C1QTNF1	C1QTNF1	4	0	0	0	0	NO	NO
C1QTNF2	C1QTNF2	4	0	0	0	0	NO	NO
C1QTNF3	C1QTNF3	4	0	0	0	0	NO	NO
C1QTNF4	C1QTNF4	4	0	0	0	0	NO	NO
C1QTNF5	C1QTNF5	4	0	0	0	0	NO	NO
C1QTNF6	C1QTNF6	4	0	0	0	0	NO	NO
C1QTNF7	C1QTNF7	4	0	0	0	0	NO	NO
C1QTNF8	C1QTNF8	4	0	0	0	0	NO	NO
C1RL	C1RL	4	0	0	0	0	NO	NO
C1S	C1S	4	0	0	0	0	NO	NO
C2	C2	4	0	0	0	0	NO	NO
C20orf112	C20orf112	4	0	0	0	0	NO	NO
C20orf141	C20orf141	4	0	0	1	0	YES	NO
C20orf144	C20orf144	4	0	0	0	0	NO	NO
C20orf166	C20orf166	4	0	0	0	0	NO	NO
C20orf173	C20orf173	4	0	0	0	0	NO	NO
C20orf187	C20orf187	2	0	0	0	0	NO	NO
C20orf194	C20orf194	4	0	0	0	0	NO	NO
C20orf195	C20orf195	4	0	0	0	0	NO	NO
C20orf196	C20orf196	4	0	0	0	0	NO	NO
C20orf197	C20orf197	4	0	0	0	0	NO	NO
C20orf201	C20orf201	4	0	0	0	0	NO	NO
C20orf202	C20orf202	4	0	0	0	0	NO	NO
C20orf24	C20orf24	4	0	0	0	0	NO	NO
C20orf26	C20orf26	4	0	0	0	0	NO	NO
C20orf27	C20orf27	4	0	0	1	1	YES	YES
C20orf62	C20orf62	4	0	0	0	0	NO	NO
C20orf78	C20orf78	4	0	0	0	0	NO	NO
C20orf85	C20orf85	4	0	0	0	0	NO	NO
C20orf96	C20orf96	4	0	0	1	0	YES	NO
C21orf119	C21orf119	4	0	0	0	0	NO	NO
C21orf128	C21orf128	4	0	0	0	0	NO	NO
C21orf2	C21orf2	4	0	0	1	0	YES	NO
C21orf33	C21orf33	4	4	4	0	0	YES	YES
C21orf37	C21orf37	1	0	0	0	0	NO	NO
C21orf49	C21orf49	4	0	0	0	0	NO	NO
C21orf54	C21orf54	4	0	0	0	0	NO	NO
C21orf58	C21orf58	4	0	0	0	0	NO	NO
C21orf59	C21orf59	4	0	0	0	0	NO	NO
C21orf62	C21orf62	4	0	0	0	0	NO	NO
C21orf67	C21orf67	4	0	0	0	0	NO	NO
C21orf88	C21orf88	4	0	0	1	0	YES	NO
C21orf90	C21orf90	4	0	0	0	0	NO	NO
C21orf91	C21orf91	4	0	0	1	0	YES	NO
C22orf15	C22orf15	4	0	0	0	0	NO	NO
C22orf23	C22orf23	4	0	0	1	0	YES	NO
C22orf24	C22orf24	4	0	0	0	0	NO	NO
C22orf26	C22orf26	4	0	0	0	0	NO	NO
C22orf29	C22orf29	4	0	0	1	0	YES	NO
C22orf31	C22orf31	4	0	0	0	0	NO	NO
[truncated: 16,052 more rows]
